1 **Mapping brain-wide excitatory projectome of primate prefrontal cortex**  
2 **at submicron resolution: relevance to diffusion tractography**

3 Mingchao Yan<sup>1,2†</sup>, Wenwen Yu<sup>1,3†</sup>, Qian Lv<sup>1</sup>, Qiming Lv<sup>1</sup>, Tingting Bo<sup>1,2</sup>, Xiaoyu Chen<sup>1,2</sup>,  
4 Yilin Liu<sup>1,2</sup>, Yafeng Zhan<sup>1,2</sup>, Shengyao Yan<sup>1,2</sup>, Xiangyu Shen<sup>1</sup>, Baofeng Yang<sup>3</sup>, Zilong  
5 Qiu<sup>1</sup>, Yuanjing Feng<sup>4</sup>, Xiaoyong Zhang<sup>3</sup>, He Wang<sup>3</sup>, Fuqiang Xu<sup>5</sup>, Zheng Wang<sup>1,2\*</sup>

6 <sup>1</sup>Institute of Neuroscience, State Key Laboratory of Neuroscience, Center for Excellence  
7 in Brain Science and Intelligence Technology, Chinese Academy of Sciences, Shanghai  
8 200031, China.

9 <sup>2</sup>University of Chinese Academy of Sciences, Beijing100049, China.

10 <sup>3</sup>Institute of Science and Technology for Brain-inspired Intelligence, Fudan University,  
11 Shanghai 200433, China.

12 <sup>4</sup>College of Information Engineering, Zhejiang University of Technology, Hangzhou,  
13 310014, China.

14 <sup>5</sup>Shenzhen Key Lab of Neuropsychiatric Modulation and Collaborative Innovation Center  
15 for Brain Science, Guangdong Provincial Key Laboratory of Brain Connectome and  
16 Behavior, CAS Key Laboratory of Brain Connectome and Manipulation, Brain Cognition  
17 and Brain Disease Institute (BCBDI), Shenzhen Institutes of Advanced Technology,  
18 Shenzhen-Hong Kong Institute of Brain Science-Shenzhen Fundamental Research  
19 Institutions, Shenzhen 518055, China.

20 † These authors contributed equally to this work

21 \* **Corresponding author:** Zheng Wang (Institute of Neuroscience, Chinese Academy of  
22 Sciences, 320 Yueyang Road, Shanghai 200031, China; Tel: 86-21-54921713; Fax: 86-  
23 21-54921735;)

24 **Email:** zheng.wang@ion.ac.cn

25 **Running title:** Excitatory projectome of ventrolateral prefrontal cortex

26

1 **Abstract**

2 Resolving trajectories of axonal pathways in the primate prefrontal cortex remains crucial  
3 to gain insights into higher-order processes of cognition and emotion, which requires a  
4 comprehensive map of axonal projections linking demarcated subdivisions of prefrontal  
5 cortex and the rest of brain. Here we report a mesoscale excitatory projectome issued from  
6 the ventrolateral prefrontal cortex (vlPFC) to the entire macaque brain by using viral-based  
7 genetic axonal tracing in tandem with high-throughput serial two-photon tomography,  
8 which demonstrated prominent monosynaptic projections to other prefrontal areas,  
9 temporal, limbic and subcortical areas, relatively weak projections to parietal and insular  
10 cortices but no projections directly to the occipital lobe. In a common 3D space, we  
11 quantitatively validated an atlas of diffusion tractography-derived vlPFC connections with  
12 correlative enhanced green fluorescent protein-labelled axonal tracing, and observed  
13 generally good agreement except a major difference in the posterior projections of inferior  
14 fronto-occipital fasciculus. These findings raise an intriguing question as to how neural  
15 information passes along long-range association fiber bundles in macaque brains, and call  
16 for the caution of using diffusion tractography to map the wiring diagram of brain circuits.  
17

## 1 **Introduction**

2 Higher-order processes of cognition and emotion regulation that depend on the prefrontal  
3 cortex are all based on multiple, long-range connections between neurons<sup>1, 2, 3</sup>. Axons  
4 connecting local and distant neurons form a fundamental skeleton of the brain circuitry,  
5 which is of paramount importance to fathom the organization of in-/output pathways that  
6 enable those vital functions<sup>4, 5</sup>. Given the complexity and heterogeneity of the primate  
7 prefrontal cortex<sup>2</sup>, understanding the working mechanisms of the prefrontal cortex requires  
8 a comprehensive map of axonal projections linking its demarcated subdivisions and the  
9 rest of brain. A subdivision of the prefrontal cortex - the ventrolateral section (vlPFC),  
10 which mainly spans Brodmann's Areas 44, 45a/b, 46v/f and 12r/l<sup>6</sup>, is central to a variety  
11 of functions including language, objective memory and decision making<sup>7, 8</sup>. Emerging  
12 evidence further demonstrates abnormalities of vlPFC in tight association with deficits in  
13 cognitive flexibility<sup>1, 9, 10</sup>, suggesting that an elaborate delineation of its hard wiring would  
14 shed light on the underlying neuropathology of psychiatric disorders<sup>11</sup>.

15 Such neuroanatomical inter-areal connectivity has been probed using invasive bulk  
16 injections of tracers and noninvasive imaging methods with millimeter-scale spatial  
17 resolution<sup>12, 13, 14</sup>. Histological neural tracing has been historically utilized for  
18 circuit/pathway mapping and continues to be the most reliable way of survey all myelinated  
19 axons in mammalian brains<sup>12, 20, 21</sup>, which has also been used as a gold standard to validate  
20 other modalities like diffusion tractography<sup>18, 22, 23, 24, 25, 26</sup>. Diffusion tractography, which  
21 has been developed in 1990s to estimate the tissue microstructure by means of spatial  
22 encoding of water molecule movements<sup>15</sup>, represents the only methodology capable of  
23 inferring the ensemble of anatomical connections in the living animal or human brain<sup>16, 17</sup>.  
24 But this technique is an indirect observation with limited resolution and accuracy, and its  
25 reliability of false negative and false positive findings remains to be fully validated in a 3D  
26 space<sup>18, 19</sup>. Notably, some classic tract tracing methods are not sensitive to specific  
27 neuronal types or axonal trajectories. They do not report the traveling course in a 3D space  
28 through which the axons travel for a remarkably long distance (i.e., over centimeter length).  
29 The pursuit of long-range axonal fiber tracing across the entire monkey brain has become  
30 feasible thanks to rapid advance in viral and genetic tools in the primate species, tissue  
31 labeling, large-scale microscopy and computational image analysis<sup>27, 28, 29, 30</sup>. Moreover,

1 viral-based techniques for targeting specific neuronal types in macaque brain have  
2 achieved remarkable success<sup>27, 31</sup>, which may furnish the requisite biological detail  
3 including excitatory and inhibitory in-/output to enrich structural network reconstructions  
4 for improved prediction of brain function<sup>32</sup>. However, it remains unclear thus far what type  
5 of viral vector is suitable for long-range axonal fiber tracing<sup>12, 20</sup>.

6 In the present study, we aim to establish a comprehensive brain-wide excitatory  
7 projectome of the vIPFC in macaque monkeys using viral-based genetic tracing in tandem  
8 with serial two-photon (STP) tomography, a technique that has successfully achieved high-  
9 throughput fluorescence imaging of the entire mouse brain by integrating two-photon  
10 microscopy and tissue sectioning<sup>33</sup>. In addition, in a common 3D space reconstructed with  
11 STP tomography, we intended to make a direct comparison of this mesoscale projectome  
12 to that derived from ultra-high field diffusion tractography (Fig. 1). Note that cross-  
13 comparison of the fiber details generated by two modalities with spatial scale differences  
14 in order of magnitude is technically demanding as many cellular structures or fiber  
15 pathways of biological interest are rather small relative to the voxel size of most diffusion  
16 MRI data<sup>17</sup>. One of challenging undertakings is to image long-range axonal fibers of many  
17 neurons with sufficiently high resolution to enable tracking axonal trajectories across the  
18 entire brain<sup>33, 34</sup>, which has stirred some debates such as right-angle fiber crossings<sup>16, 24</sup> and  
19 the existence of the inferior fronto-occipital fasciculus in the primate brain<sup>35</sup>.

20

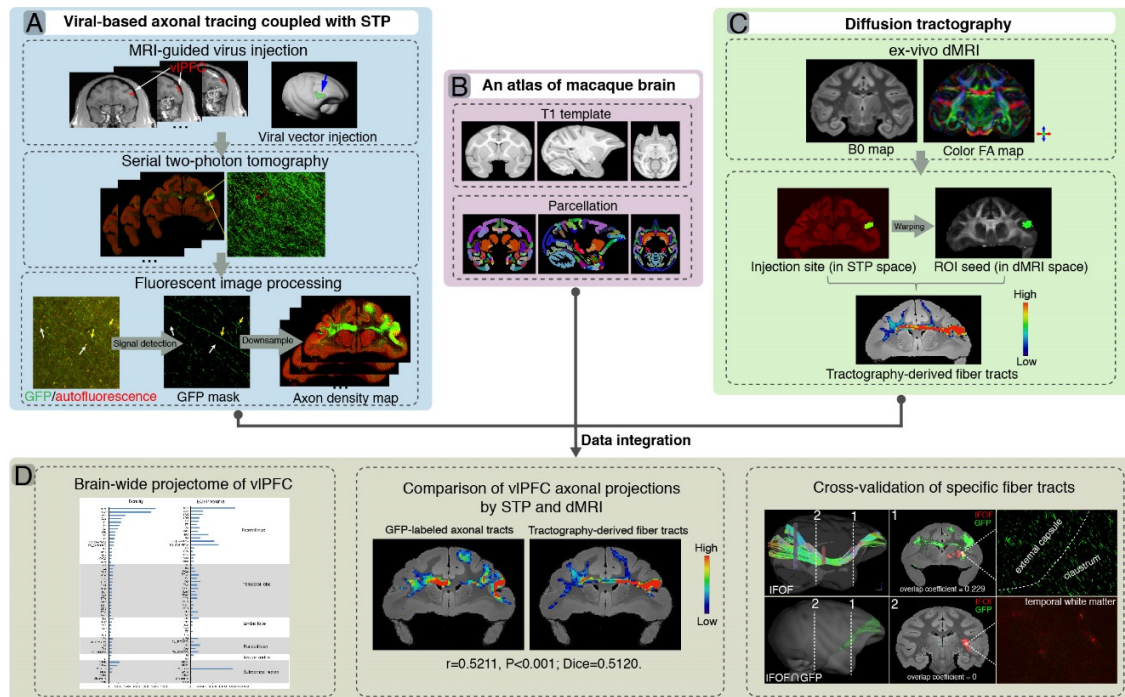

1  
2 **Fig. 1. A flowchart diagram for brain-wide analyses of vIPFC projectome in macaques.** The  
3 pipeline integrates the STP data in the mesoscopic domain (A) with macroscopic dMRI data (C) in a  
4 common 3D space (B). (A) T1 images were used to guide stereotaxic injection of AAV vectors to vIPFC  
5 (upper panel). High-throughput fluorescent images of viral-based genetic axonal tracing were acquired  
6 by STP tomography throughout the brain, which enables a close-up view and quantitative analysis of  
7 any region-of-interest (middle panel). A supervised machine learning approach was used for  
8 segmentation of GFP-positive signal and removal of autofluorescence in STP data. The serial segmented  
9 GFP images were down-sampled to compute the total signal intensity for each  $200\ \mu\text{m} \times 200\ \mu\text{m}$  grid  
10 by summing the number of signal-positive pixels in that grid and to generate the axonal density map  
11 (bottom panel). (B) An MRI atlas of cynomolgus macaques was used to construct a common 3D space.  
12 (C) Ex-vivo dMRI of macaque brain were acquired with using an 11.7T MRI scanner, illustrated as  
13 representative B0 (left) and direction-encoded color FA maps (right). Using the injection site identified  
14 from the STP data as seed regions, the target fiber tracts can be derived from diffusion tractography. (D)  
15 Integration of STP and dMRI data was implemented in a common 3D space, which allows quantitative  
16 analyses including whole-brain analysis of axonal projectome (left), comparison of vIPFC projectome  
17 by STP and dMRI (middle), and cross-validation of fiber tracking in both STP and dMRI (right).

18  
19

## 20 Results

### 21 Determination of viral vectors for long-range anterograde tracing

1 We tested whether VSV, lentivirus, and AAV vectors with demonstrated success in rodents  
2 worked in the macaque brain and which vector was best suitable for long-range axonal  
3 fiber tracing. Five days after infection with VSV- $\Delta$ G, the neuronal cell bodies in the  
4 cerebral cortex (Fig. 2A and B) and thalamus (Fig. S1A) were clearly labelled with GFP,  
5 although only proximal neurites were labeled with no long-range axonal fibers detected  
6 (Fig. S2A). When the infection time was extended to about a month, we observed  
7 widespread axon loss and neuronal cell death (Fig. S1B-G). The infected neurons  
8 underwent morphological changes such as membrane blebbing (Fig. S1B and C), a key  
9 morphological change associated with the induction of apoptosis. Local injection with  
10 VSV- $\Delta$ G mediated rapid and transient gene expression nearby the injection site, and an  
11 extension of infection time evidently caused fatal neurotoxicity.

12 Lenti-Ubic-GFP exhibited stable expression in the cell soma even after 9 months (Fig.  
13 2C and D), despite sparse labeling of GFP positive axons (Fig. S2B). By contrast, six weeks  
14 after AAV2/9-CaMKIIa-Tau-GFP was injected into the premotor cortex (Fig. 2E), axonal  
15 fiber bundles like anterior limb of internal capsule (ALIC) (Fig. 2G) were clearly visualized  
16 over several centimeters along the frontal white matter. As a validation test, AAV2/9  
17 construct encoding mCherry was co-injected with AAV2/9 construct encoding Tau-GFP  
18 into the premotor cortex. And we found that the signal intensity of most Tau-GFP labeled  
19 axons was consistently higher than that of mCherry labeled axons (Fig. S3A-D).

20 We compared the axonal fiber tracing efficiency of VSV- $\Delta$ G, Lentivirus and AAV2/9  
21 (AAV2/9-CaMKIIa-Tau-GFP) in the mediodorsal (MD) thalamus (Fig. S2). The density of  
22 axonal fibers labelled by AAV2/9 (Fig. S2C) was significantly higher ( $p < 0.001$ , Fig. S2D)  
23 than by Lentivirus (Fig. S2B), and VSV- $\Delta$ G (Fig. S2A). VSV- $\Delta$ G labeled axons sparse in  
24 the proximal, and the axonal density decreased sharply (Fig. S2D). Axons labeled by  
25 Lentivirus (Fig. S2B) were also significantly denser ( $p < 0.01$ , Fig. S2D) than by VSV- $\Delta$ G  
26 (Fig. S2A) distant from the injection site.

27

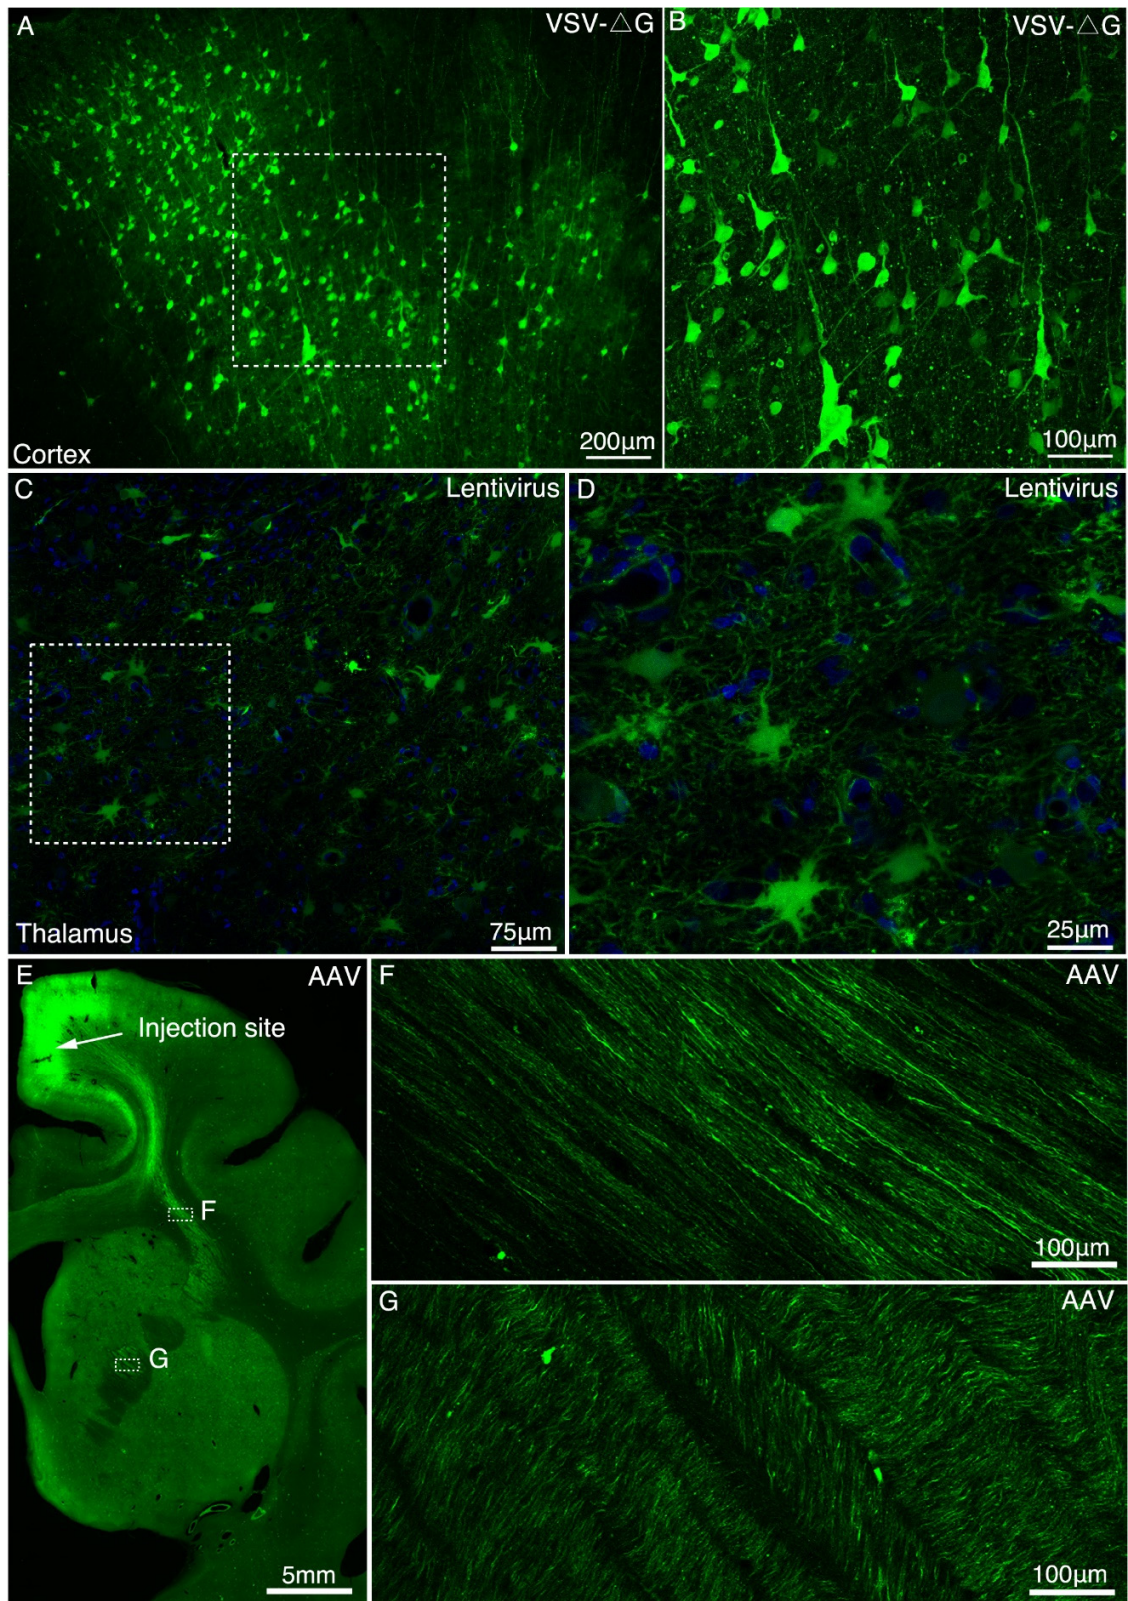

1

2 Fig. 2. Determination of viral vectors for long-range anterograde tracing in macaques. (A) GFP-

1 labeled neurons were found in the premotor cortex ~5 days after injection of VSV- $\Delta$ G encoding Tau-  
2 GFP. (B) A magnified view illustrating the morphology of GFP-labeled neurons in the area outlined  
3 with a white box in (A). (C) Lentivirus construct was injected into the macaque thalamus and examined  
4 for transgene expression after ~9 months. (d) High power views of the dotted rectangle in panel C. (E)  
5 GFP-labeled neurons and axons were observed in the premotor cortex ~42 days after injection of  
6 AAV2/9 encoding Tau-GFP. Two dashed line boxes enclose the regions of interest: frontal white matter  
7 and ALIC, whose GFP signal are magnified in (F) and (G), respectively.

8

### 9 **Brain-wide excitatory projectome of vLPFC in macaques**

10 AAV2/9 encoding Tau-GFP under the control of excitatory promoter CaMKII $\alpha$  was  
11 determined as an anterograde tracer for mapping the excitatory projectome of vLPFC. The  
12 injection site in vLPFC, validated by STP images, including area 45, 12l and 44, was  
13 precisely located in cortical gray matter (Fig. 4A-D). To identify the cell type specificity  
14 of Tau-GFP gene expression driven by the CaMKII- $\alpha$  promoter, immunofluorescent  
15 staining was performed with antibodies against the excitatory neuron specific marker  
16 CaMKII- $\alpha$  and the inhibitory neuron-specific neurotransmitter GABA. GFP-positive  
17 neurons in the injection site were observed positive for CaMkII $\alpha$  (Fig. S4A-C) and negative  
18 for GABA (Fig. S4D-F), indicating that the AAV labeled neurons were glutamate excitatory  
19 neurons.

20 To acquire a detailed account of the brain-wide vLPFC projectome, we analyzed its  
21 connectivity profile with other 173 parcellated regions in the monkey brain atlas using the  
22 STP tomography data (Fig. 3 and 4). The GFP-labelled projecting axons largely  
23 encompassed the anterior part of the brain including the frontal lobe, temporal lobe, limbic  
24 lobe, insular, and some subcortical regions, but no labeled axons were found in the occipital  
25 lobe (Fig. 3A-C). Within the frontal lobe, GFP-labeled projecting axons were markedly  
26 dense in the OFC, rostrally distributed in area 12m (Fig. 4E, F and G), 12o (Fig. 4E), 11l  
27 (Fig. 4E, H and I), 13l (Fig. 4E) and 13m (Fig. 4E). The 12m received strongest innervation  
28 from vLPFC relative to other OFC subregions (Fig. 4E). Laterally, axonal projections were  
29 found in the FEF including 8Av (Fig. S5A, B and C) and 8Ad (Fig. S5A and D). Dorsally,  
30 there were dense axonal fibers in the dorsal prefrontal cortex, including area 8Bd (Fig. S5E,  
31 F and G), 8Bm (Fig. S5E), 8Bs (Fig. S5E), 46d (Fig. S5E, J and K), and 9d (Fig. S5E, H  
32 and I). The 8Bd and 46d received relatively more innervation compared with 9d, 8Bs and



1 8Bm (Fig. S5E). On the medial surface of the brain, scattered axon fibers were visible in  
2 area F5 (Fig. S5L and M), F7 (Fig. S5L and N), and F2 (Fig. S5L) of the premotor cortex.  
3 The axons with the premotor cortex exhibited a gradient pattern with the largest axon  
4 distribution along the anterior part (Fig. S5L). In addition, axons were noted in the  
5 precentral opercular area (PrCO) and medial prefrontal area (mainly in 10mr) (Fig. 3C).  
6 Interestingly, the projections anchored in the prefrontal cortex of these axonal fibers formed  
7 isolated clusters (Fig. 4F and H, indicated by arrows). The z-axis extent of axonal clusters  
8 was ranging from 1.2 mm to 3.8 mm ( $2.24 \pm 0.80$  mm) (Fig. S6).

9 Beyond the frontal lobe, rich connections were observed in the temporal lobe (Fig. 3),  
10 predominantly in caudal lateral (CL), caudal (CPB) and rostral (RPB) portions of parabelt  
11 region of the auditory cortex; anterior TE (TEa), medial TE (TEm), superior temporal  
12 polysensory area (STP, correspond to areas PGa and TPO), IPa and TAa of the dorsal  
13 bank/ventral bank/fundus of the superior temporal sulcus (STSd/v/f) (Fig. 3C); medial  
14 superior temporal area (MST), floor of superior temporal area (FST), anteroventral TE  
15 (TEav), anterodorsal TE (TEad) and area TEO of superior temporal area. The vIPFC also  
16 sends axons to limbic lobe, mainly in 24a, 24a', 24b, 24b' and 24c of anterior cingulate  
17 areas (ACC) (Fig. 3C); area TF of parahippocampal cortex (Fig. 3C). Relatively weak  
18 projections were observed in the dorsal subdivision of lateral intraparietal area (LIPd); 7a  
19 and 7b of inferior parietal lobule areas; secondary somatosensory area (SII) and parietal  
20 operculum (7op) of the parietal cortex (Fig. 3C). There were some sparsely labelled axons  
21 in the granular insula (Ig) and lateral agranular insula (Ial) area (Fig. 3C). In white matter,  
22 traveling axonal bundles were found in the corpus callosum, anterior limb of internal  
23 capsule (ALIC, Fig. S7A-B), and anchored into the MD thalamus (Fig. S7C-D).  
24 Subcortically, axon clusters were observed in the medial (Fig. S7F-G) and caudal (Fig.  
25 S7H) parts of caudate. High resolution confocal images revealed that axons in MD (Fig.  
26 S7D) and caudate (Fig. S7J) were thinner than those in the ALIC (Fig. S7B). Furthermore,  
27 the labelled axons was found extending to the parvicellular part of accessory basal nucleus  
28 of amygdala (ABpc), reticulate and compacta parts of substantia nigra (SNr/c), claustrum  
29 and subthalamic nucleus (STN) (Fig. 3C).

30

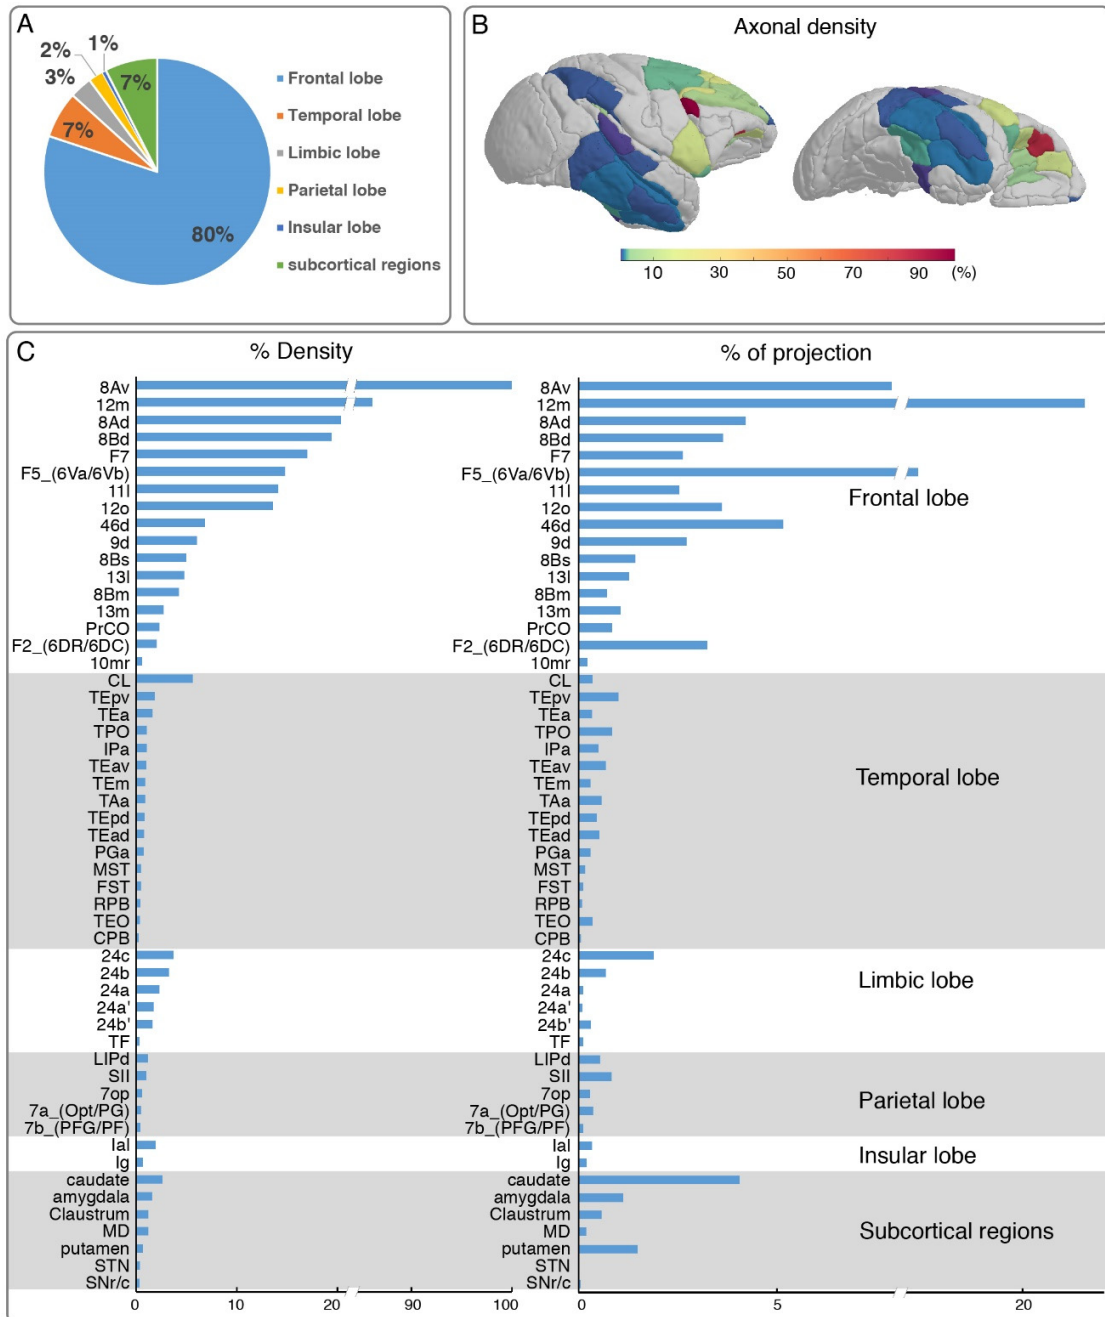

1  
 2 **Figure 3. Brain-wide distribution of GFP-labelled excitatory projectome of vIPFC.** (A) A pie chart  
 3 shows the brain-wide distribution of vIPFC axonal projectome. (B) The normalized percentage  
 4 distribution of axonal density was rendered onto a 3D brain surface. (C) The histogram plots show the  
 5 vIPFC projections to other regions where the connectivity strength was quantified by the density of  
 6 GFP-positive axons and proportion of total projection. We calculated the innervation density, given in  
 7 percent of strongest projection.

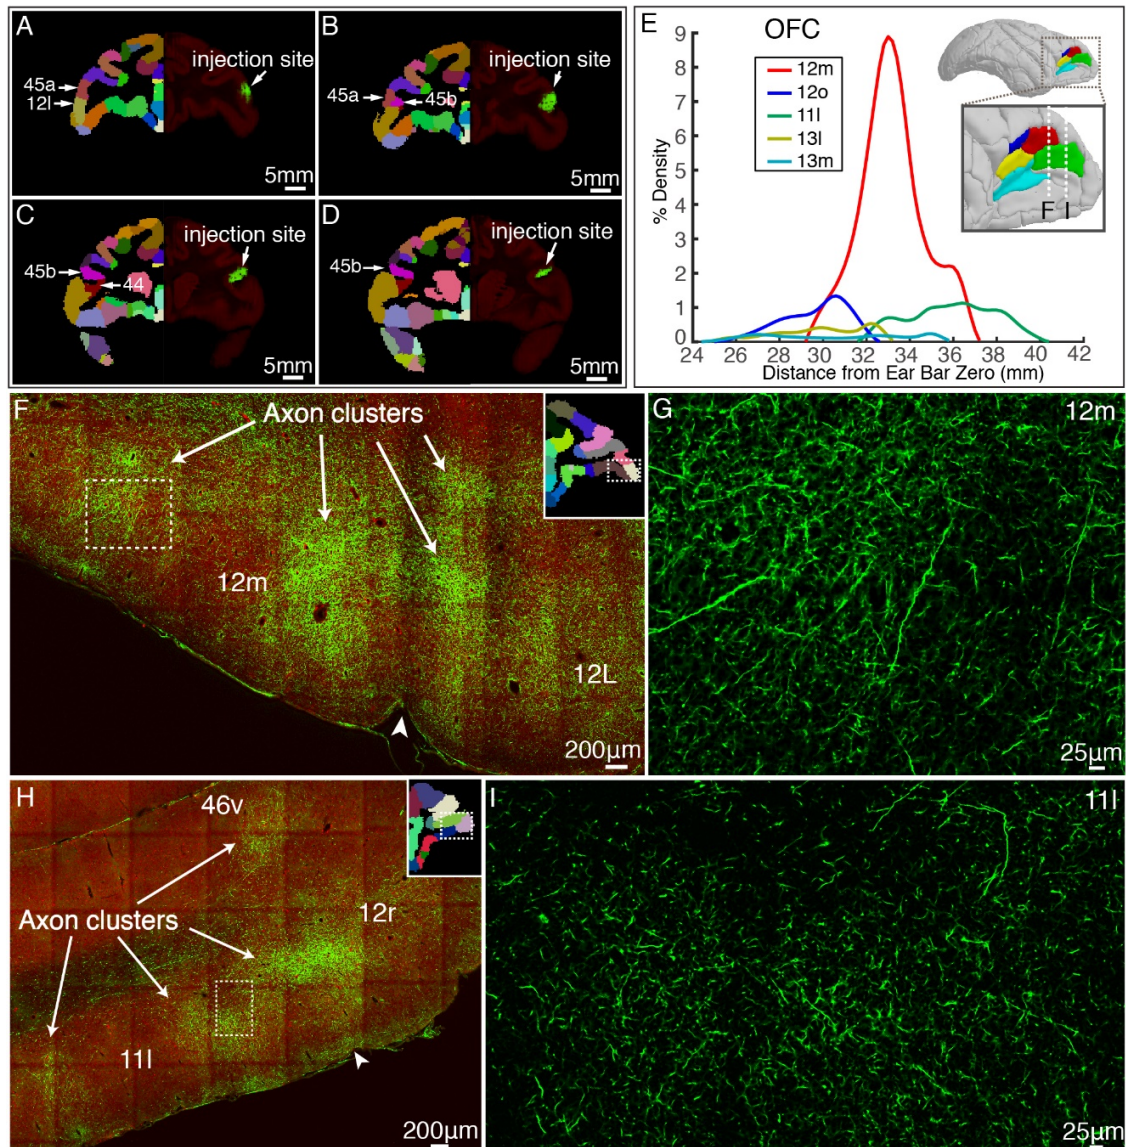

1  
 2 **Figure 4. vIPFC projectome within the prefrontal lobe.** (A-D) Representative coronal slices of the  
 3 injection sites in vIPFC are shown overlaid with the monkey brain template (left hand side), mainly  
 4 spanning areas 45a, 45b, 12l and 44. (E) Percentage of output density of vIPFC projectome along the  
 5 anterior-posterior axis of the OFC. The inset shows the spatial location of individual Brodmann areas  
 6 in OFC. Dotted lines indicate anterior-posterior position of the following fluorescent images. (F-I)  
 7 Representative two-photon images of vIPFC axonal projections to OFC: 12m and 11l. Arrows indicate  
 8 the axon clusters. Insets show the low power images of the section indicating the position of the higher  
 9 power images.

10

11 **Comparison of vIPFC axonal projections by dMRI and STP**

1 We further introduced a quantitative comparison of vIPFC connectivity profile obtained by  
2 dMRI-based tractography and STP data. Typical T2-weighted and dMRI images of the  
3 macaque brain acquired from an ultra-high field MRI scanner were shown in [Fig. 5A-D](#).  
4 To carry out a proof-of-principle investigation, we focused on the vIPFC-CC-contralateral  
5 tract that was reconstructed in 3D space by using STP and dMRI data, respectively ([Fig.](#)  
6 [6A and B](#)). After co-registering the reconstructed tracts into a common 3D space, our  
7 approach relied on slice-based statistical correlation methods (the Pearson correlation and  
8 Dice coefficients) along this vIPFC-CC-contralateral tract. Upon visual comparison, the  
9 dMRI-derived tracts largely overlapped with the axonal bundles shown in STP images ([Fig.](#)  
10 [6A and B](#)). Statistical correlation indices were computed for each pair of diffusion  
11 tractography and STP images to quantify their spatial overlap. We found consistent, marked  
12 agreement between these two modalities along this tract ([Fig. 6C](#)), as demonstrated in [Fig.](#)  
13 [6 D-F](#). For all slices (spaced by 500  $\mu\text{m}$ ) along vIPFC-CC-contralateral tract, we observed  
14 consistent and significant correlations between these two modalities ( $R = 0.4368 \pm 0.0850$ ;  
15  $\text{Dice} = 0.4061 \pm 0.0939$ ). Two example GFP-labelled axon images as marked in [Fig. 6F](#)  
16 were displayed in [Fig. 6G-J with different magnifications](#), showing typical travelling axons  
17 in corpus callosum ([Fig. 6 G and H](#)) and frontal white matter ([Fig. 6 I and J](#)).  
18

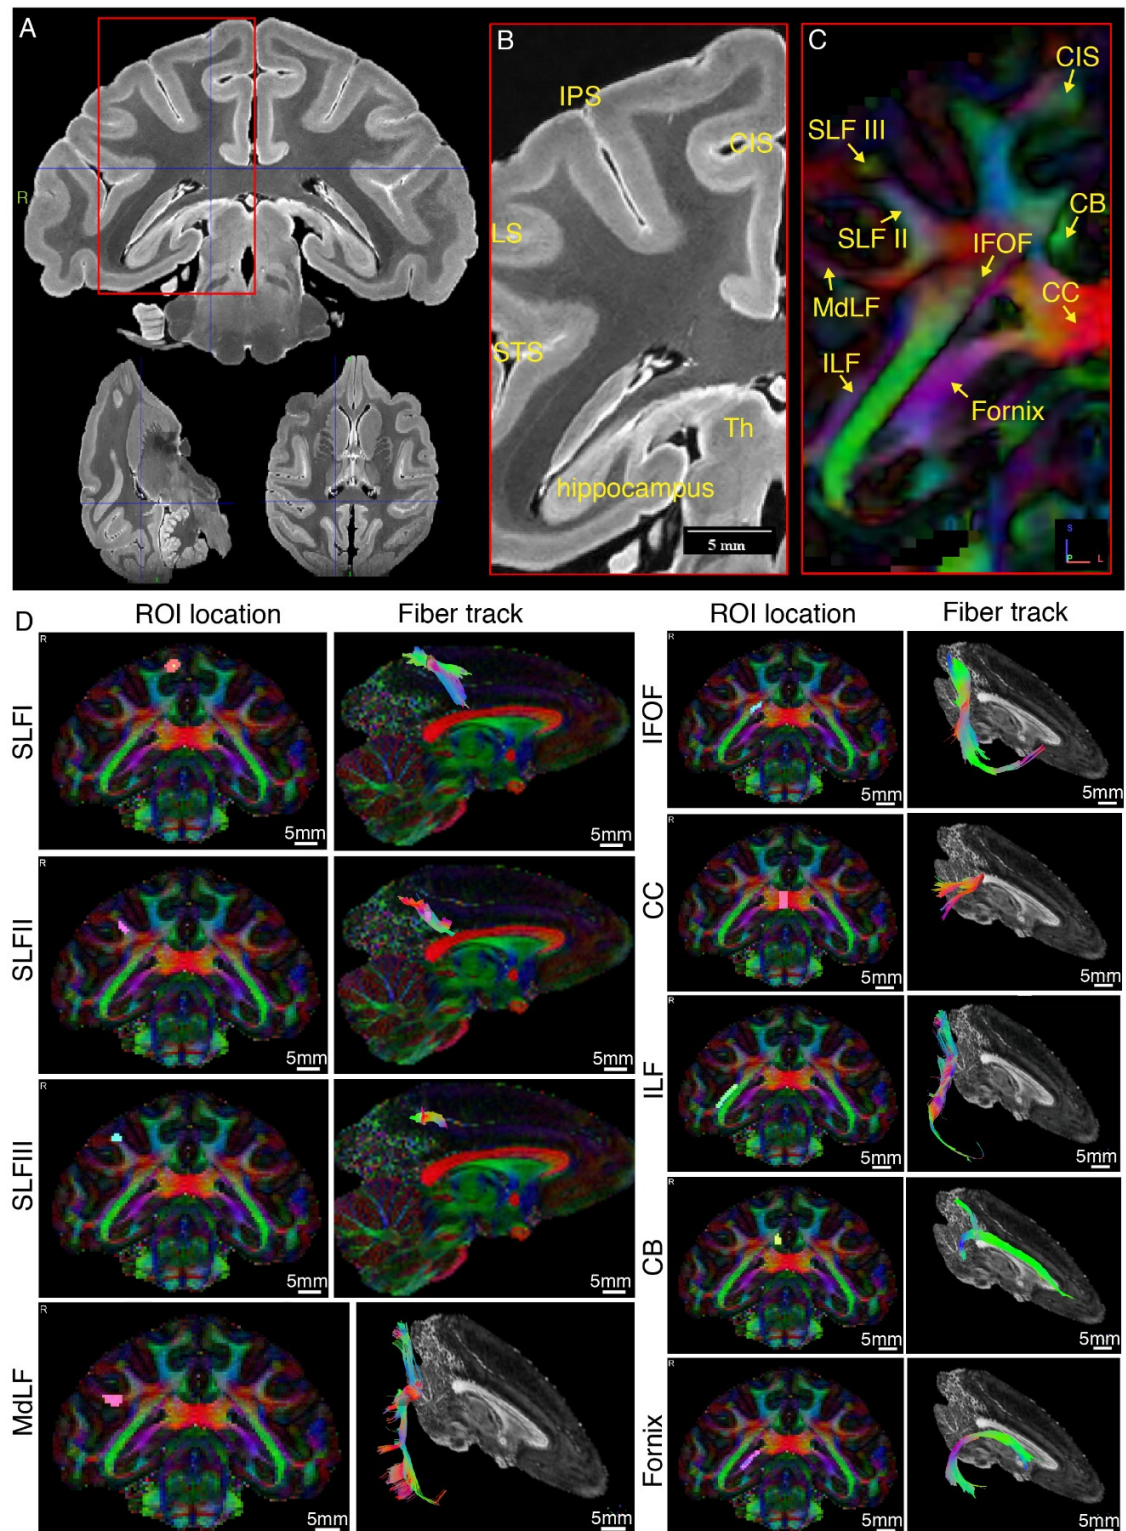

1  
2 **Figure 5. Representative *ex-vivo* MRI images of the macaque brain.** (A) Typical high-resolution T2-  
3 weighted images were shown in axial, coronal, and sagittal planes. (B) Zoom-in view of the red box in

1 a, shown with anatomical landmark gyri including intraparietal sulcus (IPS), lunate sulcus (LS), superior  
2 temporal sulcus (STS), and cingulate sulcus (CIS). (C) The color-coded FA map corresponding to b.  
3 Major fiber bundles including superior longitudinal fasciculus subcomponent I, II and III (SLF-I, -II, -  
4 III), inferior fronto-occipital fasciculus (IFOF), inferior longitudinal fasciculus (ILF), middle  
5 longitudinal fasciculus (MdLF), corpus callosum (CC), cingulum bundle (CB) and fornix are clearly  
6 demonstrated. Red color codes left and right, blue color codes anterior and posterior, and green color  
7 codes superior and inferior directions. (D) Typical tractography of the main fiber bundles indicated in c  
8 are derived from the present dMRI data. The ROI locations and fiber tracks are overlaid on the color-  
9 coded FA maps.

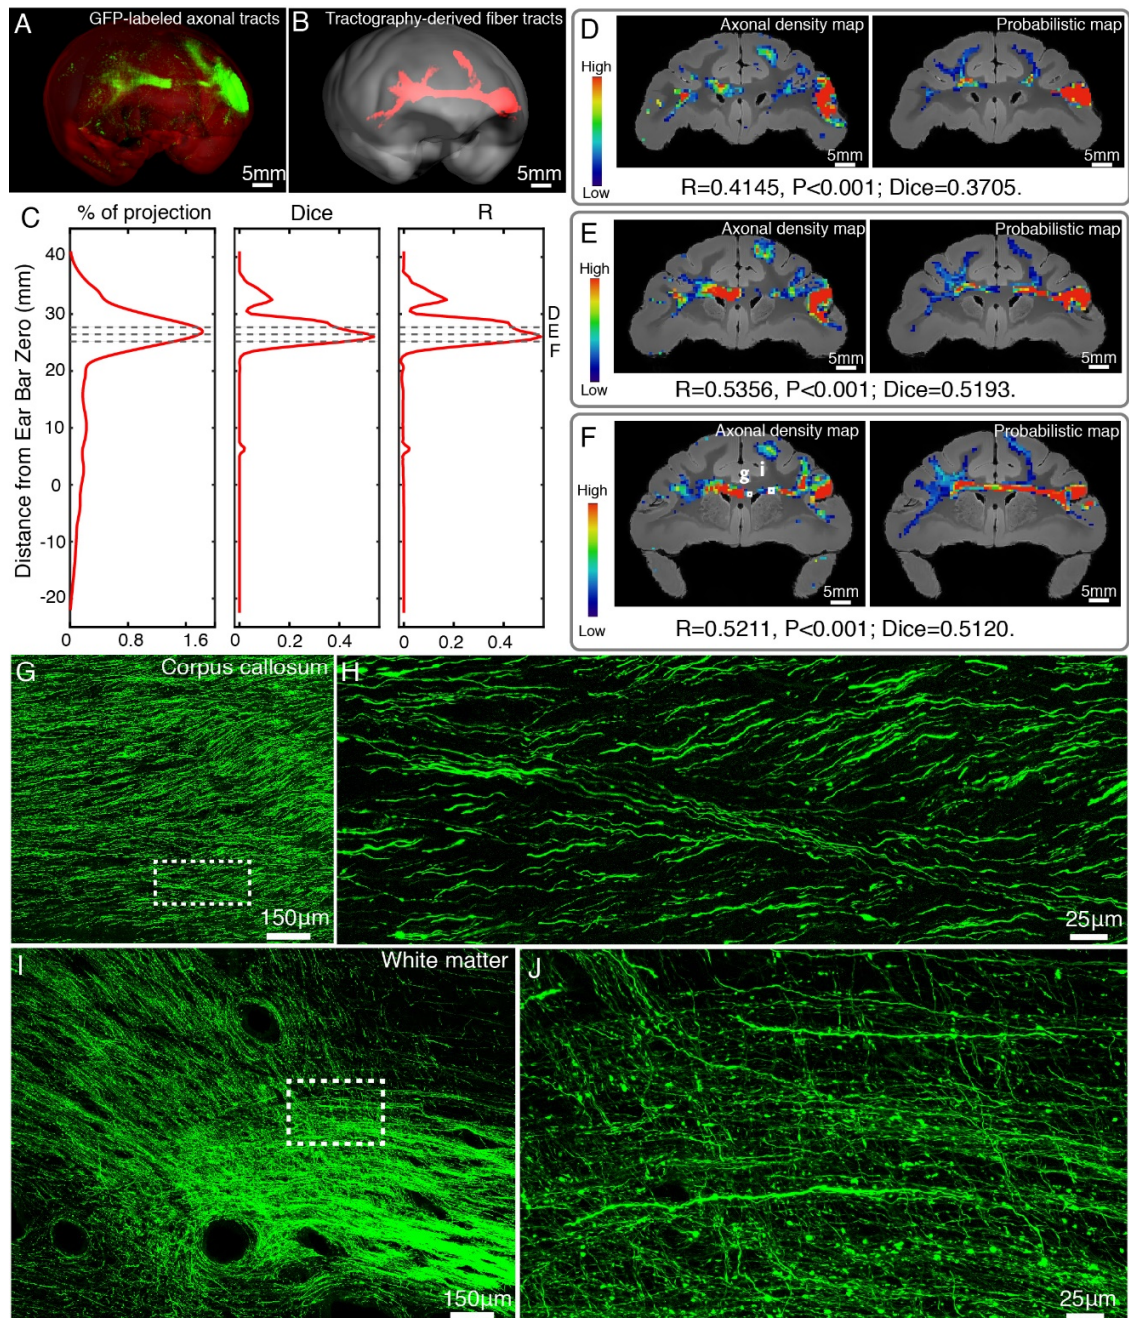

1  
2 **Figure 6. Comparison of vIPFC connectivity profiles by STP tomography and diffusion**  
3 **tractography.** (A, B) 3D visualization of the fiber tracts issued from the injection site in vIPFC to  
4 corpus callosum to the contralateral vIPFC by STP tomography and diffusion tractography. (C)  
5 Percentage of projection, Dice coefficients and Pearson coefficients (R) were plotted along the anterior-  
6 posterior axis in the macaque brain. (D-F) Representative coronal slices of the diffusion tractography  
7 map and the axonal density map along the vIPFC-CC-contralateral tract, overlaid with the corresponding  
8 anatomical MR images. (G-J) GFP-labeled axon images as marked in Fig. 6F were shown with

1 magnified views. (H, J) correspond to high magnification images of the white boxes indicated in G and  
2 I, both of which presented a great deal of details about axonal morphology.

3

#### 4 **Inferior fronto-occipital fasciculus in macaques**

5 As illustrated by diffusion tractography, the inferior fronto-occipital fasciculus (IFOF) in  
6 macaques is a long-ranged bowtie-shaped tract (Fig. 7A), showing traveling course similar  
7 to humans. The frontal stem of IFOF spread to form a thin sheet, and its temporal stem  
8 narrowed in coronal section, mainly gathered at the external capsule. The intersection  
9 between IFOF and axonal projections of vLPFC was shown in a common 3D space of  
10 diffusion tractography in Fig. 7B, whereby the posterior part of vLPFC axonal projections  
11 apparently end at the middle superior temporal region, far from the occipital lobe. To  
12 quantify the spatial correspondence between the IFOF tract and vLPFC projectome, the  
13 Szymkiewicz-Simpson overlap coefficient was calculated in a shared common 3D space  
14 after co-registration. It was 0.038 in 3D space, indicating that only a small fraction of the  
15 IFOF tract and vLPFC projectome overlapped (mainly in the front half of the brain, Fig. 7).  
16 Also the Szymkiewicz-Simpson overlap coefficients between 2D coronal slices of IFOF  
17 and vLPFC projectome was plotted along the anterior-posterior axis of the macaque brain  
18 (Fig. 7C). The anterior part of the vLPFC axonal projections shown by STP tomography  
19 largely overlapped with the dMRI-derived IFOF tracts in frontal whiter matter (Fig. 7D),  
20 external capsule (Fig. 7E and F), claustrum (Fig. 7E and F) and extreme capsule (Fig. 7F).  
21 Meanwhile, the posterior part of dMRI-derived IFOF tract passed through temporal white  
22 matter (Fig. 7G), whereas the posterior part of fiber projections of vLPFC sent no axons to  
23 this region (Fig. 7G).

24



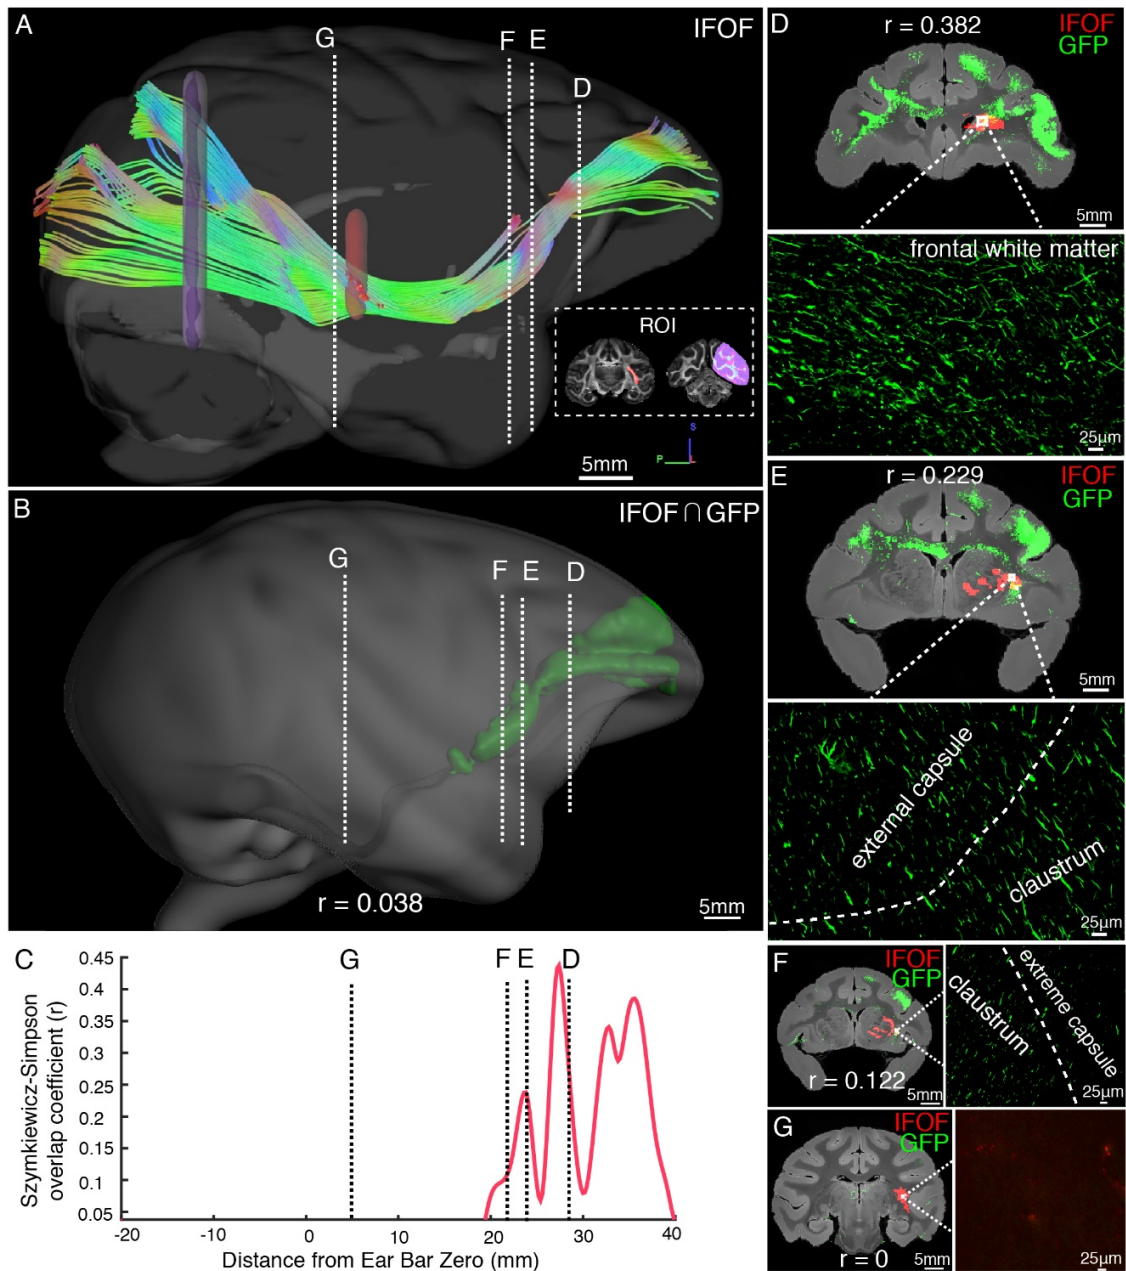

1  
 2 **Figure 7. Illustration of the inferior fronto-occipital fasciculus by diffusion tractography and STP.**  
 3 (A) The fiber tractography of IFOF (lateral view). Two inclusion ROIs at the external capsule (pink)  
 4 and the anterior border of the occipital lobe (purple) were used and shown on the coronal plane. The  
 5 IFOF stems from the frontal lobe, travels along the lateral border of the caudate nucleus and  
 6 external/extreme capsule, forms a bowtie-like pattern and anchors into the occipital lobe. (B) The  
 7 reconstructed traveling course of IFOF based on vIPFC projectome was shown in 3D space. (C) The  
 8 Szymkiewicz-Simpson overlap coefficients between 2D coronal brain slices of the dMRI-derived IFOF  
 9 tract and vIPFC projections were plotted along the anterior-posterior axis of the macaque brain. Four

1 cross-sectional slices (D-G) along the IFOF tracts were arbitrarily chosen to demonstrate the spatial  
2 correspondence between the diffusion tractography and axonal tracing of STP images. (D-G) The  
3 detected GFP signals (green) of vIPFC projectome and the IFOF tracts (red) obtained by diffusion  
4 tractography were overlaid on anatomical MRI images, with a magnified view of the box area. Evidently  
5 there was no fluorescent signal detected in the superior temporal area where the dMRI-derived IFOF  
6 tract passes through (G).

7

## 8 **Discussion**

### 9 **Brain-wide excitatory projectome of vIPFC in macaques**

10 We customized STP tomography for whole-brain imaging of the macaque monkey at  
11 submicron resolution and accomplished brain-wide 3D reconstruction of axonal  
12 connectome, thanks to prominent characteristics of STP tomography including free of  
13 tissue distortions, no need for section-to-section alignment, and high-resolution image sets  
14 readily warped in 3D space<sup>36</sup>. Importantly, we coupled STP tomography with genetic  
15 methods using enhancers/promoter elements that target specific cell types<sup>20</sup>. Previous  
16 studies have demonstrated that a CaMKII $\alpha$  promoter carried by lentivirus was able to target  
17 excitatory neurons with optogenetic proteins in the macaque brain<sup>27</sup>, and a TH promoter  
18 carried by AAV selectively targeted dopamine neurons<sup>31</sup>. Here we deployed AAV with  
19 CaMKII $\alpha$  promoter to focus on the excitatory projection of vIPFC, whereby  
20 immunofluorescent staining with both CaMKII $\alpha$  and GABA confirmed that GFP was  
21 specifically expressed in excitatory neurons. Hence, this integrated approach allows clear  
22 dissection of projection patterns from diverse neuronal types<sup>30</sup>, and enriches our knowledge  
23 about the anatomical infrastructure of neural circuits for individual cell types at the entire  
24 brain scale<sup>31</sup>.

25 Both anterograde and retrograde tracing evidence shows that vIPFC is extensively  
26 connected to other divisions of PFC including OFC, FEF and the ventral premotor cortex.  
27 Extrinsic connections beyond the PFC, vIPFC is connected mainly to the dysgranular insula,  
28 frontal operculum, somatosensory-related areas in the parietal operculum and inferior  
29 parietal cortex, visual-related areas in the inferior temporal cortex, and anterior cingulate  
30 areas<sup>6, 37</sup>. We found the excitatory projection of vIPFC to the rest of brain was compatible  
31 with previous reports using chemical tracers<sup>3, 37, 38, 39</sup>. Furthermore, we compared the  
32 current vIPFC projectome data with the well-known macaque connectivity database

1 CoCoMac<sup>40</sup>, which includes the results of several hundred published axonal tract-tracing  
2 studies in the macaque monkey brain<sup>41</sup>. Essentially the vIPFC connectivity profile shown  
3 here was markedly similar to that of CoCoMac, except that vIPFC projections to PFCol,  
4 PFCdm, PFCdl, PFCoi, PFCm, PMCVl, amygdala, and SII have not been reported in  
5 CoCoMac database or reported merely with unspecified strength. In addition, we compared  
6 vIPFC projections with one recent report<sup>37</sup>, showing that the brain regions projected from  
7 area 45 were clearly observed in the present vIPFC projection data. Note that we used the  
8 projection volume index instead of the fluorescence intensity, which has been demonstrated  
9 reliably to quantify axonal connectivity strength<sup>4</sup>. Although the passing fiber and terminal  
10 were not readily distinguishable, the results of terminal labelling that compared  
11 synaptophysin-EGFP-expressing AAV with the cytoplasmic EGFP AAV have shown high  
12 correspondence in target areas<sup>4</sup>.

13

#### 14 **AAV2/9 is suitable for long-range axonal tracing in the macaque brain**

15 Methods for tissue labeling have been continuously evolving from silver impregnation of  
16 degenerating fibers to ex-vivo visualization of axonally-transported tracers injected at  
17 single brain nuclei, and finally to an integrated style which coupled high-resolution whole-  
18 brain imaging technologies with viral and genetic tracers<sup>28</sup>. Among four viral vectors tested  
19 here, we found that AAV2/9 demonstrated the highest efficiency of long-range axonal  
20 tracing in the macaque brain. VSV was initially utilized as a transsynaptic tracer in a  
21 previous study since VSV encodes five genes, including G protein which promotes  
22 anterograde transsynaptic spread among neurons<sup>42</sup>. In our study, we used VSV with G  
23 deletions to trace axonal projection without trans-synaptic labeling, which enabled robust  
24 gene expression at remarkably higher level relative to other vectors in a very short time  
25 (less than a week). But we found that a shorter expression time of VSV- $\Delta$ G was  
26 insufficient to label axons traveling long distance whereas a longer expression time of  
27 VSV- $\Delta$ G caused cell death, consistent with a prior finding that VSV-G failed to label  
28 transsynaptic cells at distant areas<sup>43</sup>. The advantage of lentivirus, which is derived from  
29 human immunodeficiency virus type 1 (HIV-1)<sup>44</sup>, is that it has a large genetic capacity of  
30 approximately 10 Kb which allows for the expression of multiple gene and usage of more  
31 than one promoter or regulatory elements. And we found GFP expression induced by

1 lentivirus remarkably stable after 9 months in macaque monkeys, even though the labeled  
2 level was mild<sup>45</sup> and the labeled scope was limited.

3 As an effective carrier for gene delivery into the brain, AAV has a number of  
4 established advantages including minimal toxicity, weak host immune response, stable  
5 gene expression in neurons with extraordinarily high transfection efficiency (titers up to  
6  $10^{12}$ – $10^{13}$  genome copies per mL)<sup>30</sup>. One major drawback of AAV vectors is the limited  
7 packaging capacity. AAVs usually deliver gene cassettes of approximately 4.8 Kb (i.e., one  
8 or two small genes)<sup>28</sup>, which has motivated us in pursuit of biocompatible nano-based  
9 carriers<sup>46</sup>. It is well known that different AAV serotypes have their own sequences in the  
10 inverted terminal repeats such that they have distinct transfection bases towards various  
11 cell types in the brain. The recombinant virus we used was AAV2/9 which contains the  
12 inverted terminal repeats from AAV serotype 2 and the capsid proteins from AAV serotype  
13 9. Previous studies have shown that AAV2 is the most widely-used AAV vector and  
14 effectively transfects neurons of non-human primates<sup>47</sup>. In a recent report on a mouse  
15 model, researchers co-injected AAV and a classical anterograde tracer - biotinylated dextran  
16 amine (BDA) into one brain region and observed long-range projections with similar  
17 patterns by both tracers, except that BDA had more retrograde-labelled neurons, probably  
18 uptaken by passing fibers in some areas<sup>4</sup>. Together, our results have demonstrated that  
19 AAV2/9 vector was more suitable for long-range axonal fiber tracing, while VSV- $\Delta$ G was  
20 suitable for rapid gene expression and lentivirus for long-term gene expression in macaques.  
21

## 22 **Comparison of STP tomography with diffusion tractography**

23 Pioneering studies on cross-modality comparison across the whole-brain scale have been  
24 done by constructing a connectivity matrix using dMRI-based tractography and tracer-  
25 injection tracing in mice<sup>48</sup> and in monkeys<sup>18, 49, 50</sup>. The spatial correspondence of axonal  
26 fibers derived from diffusion tractography and GFP-labeled fluorescent images have been  
27 compared both in mice<sup>51, 52, 53</sup> and in macaques<sup>54</sup>. Dauguet and coworkers found that the  
28 somatosensory and motor tracts derived from diffusion tractography were visually in good  
29 agreement with the reconstructed 3D histological sections labeled by anterograde WGA-  
30 HRP tracer in a monkey brain, but suffered certain limitations for regions at remote  
31 locations from seeds<sup>54</sup>. Moreover, the structural connectivity analyses based on the

1 histological dataset provided varying correlative evidence between these two  
2 measurements (like  $r = 0.21^{49}$  using the CoCoMac tracer data<sup>40</sup> and  $r = 0.59^{18}$  using the  
3 tracer connectivity matrix from<sup>55</sup>). Note that such structural connectivity analysis does not  
4 describe a 3D correspondence of the axonal fiber trajectory, but an “end-to-end” match.  
5 STP tomography effectively transformed a series of histological slice images into a 3D  
6 space with which dMRI-derived tracts were co-registered, thus enabling a direct,  
7 quantitative comparison of the high-throughput data from these two modalities. This is  
8 technically challenging due to a giant difference in scale between the axonal fibers and  
9 image resolution of dMRI<sup>13</sup>. We have taken meticulous steps to maximize the signal-to-  
10 noise like using Gd-DTPA as an enhanced contrast agent<sup>56</sup> and to minimize the image  
11 artifacts in an ultrahigh field scanner for achieving a reasonably high spatial resolution. We  
12 observed that GFP-labeled axonal density maps not only significantly overlapped with  
13 dMRI-derived probabilistic maps throughout the traveling course, but also demonstrated  
14 comparable connectivity strengths and patterns. But caution should be born in mind that  
15 diffusion tractography estimated the Brownian motion of water molecules, from which the  
16 directionality of axons cannot be distinguished<sup>17</sup>. The viral tracing data here contained only  
17 anterograde axonal fiber projections.

18 Our particular focus on the vIPFC connectivity profile leads us to clarify the existence  
19 of the IFOF in monkeys which is heavily debated<sup>35</sup>. The IFOF in human brain was first  
20 described in the early twentieth century<sup>57</sup>, whereby the anatomy of this pathway in human  
21 has been recently shown by micro-dissection and diffusion tractography studies<sup>58, 59</sup>. Its  
22 entire course through the ventral part of the external capsule (EC) connects the occipital  
23 cortex and the parietal and temporal cortices to the frontal cortex<sup>60</sup>. Some axonal tracing  
24 studies showed connections between frontal and occipital lobes in monkeys<sup>37, 55</sup>, which  
25 was consistent with the observation by tractography<sup>61</sup> and blunt dissection<sup>60</sup> experiments.  
26 By contrast, other studies that are capable of tracking monosynaptic pathways failed<sup>62</sup>.  
27 Using the same ROIs seeds as prior studies<sup>61, 63</sup>, our ex-vivo tractography did show fiber  
28 connections between frontal and occipital lobes in monkeys, matching the trajectory of  
29 IFOF in humans. By contrast, using anterograde AAV vector without trans-synaptic  
30 capability, we found that vIPFC fiber projections passed through external capsule,  
31 claustrum and extreme capsule and anchored to the middle superior temporal region.

1 Although the trajectory of vIPFC between frontal and temporal regions matched well with  
2 the diffusion tractography of IFOF, axonal projections of vIPFC never reached the occipital  
3 lobe. Lack of monosynaptic tracing data in human subjects, we could not rule out the  
4 possibility of same scenario for IFOF in humans. If the IFOF connects the frontal lobe with  
5 the occipital lobe in a trans-synaptic manner, it unveils a hitherto unknown information  
6 relay/integration process occurring in superior temporal area of the primate species which  
7 holds great implications for neural network computation. Nevertheless, unlike the direct  
8 monosynaptic connections reported between subdivisions of PFC such as OFC and the  
9 visual cortex in mice <sup>5, 64</sup>, our results underscore a nontrivial species difference and raise  
10 interesting questions about the long-range brain organization and the functional role of  
11 superior temporal area in primates which definitely merits future examination.

12 In summary, we present a detailed excitatory connectivity projection map from vIPFC  
13 to the entire macaque brain, and demonstrate a broadly applicable roadmap of integrating  
14 3D STP tomography labeled with antero-/retro-grade tracer and diffusion tractography for  
15 the mesoscopic mapping of brain circuits in the primate species.

16

## 17 **Materials and Methods**

### 18 **Animals and Ethics statement**

19 All experimental procedures for nonhuman primate research in this study were approved  
20 by the Animal Care Committee of Shanghai Institutes for Biological Science, Chinese  
21 Academy of Science, and conformed to the National Institutes of Health guidelines for the  
22 humane care and use of laboratory animals. From November 2015 till November 2019, ten  
23 adult macaque monkeys (*Macaca mulatta* and *Macaca fascicularis*) weighting 3.5 to 12.2  
24 kg ( $7.0 \pm 2.9$  kg) were used for in this study (Table 1), two of which (*Macaca fascicularis*)  
25 were used for ex-vivo ultrahigh field dMRI scanning.

26

### 27 **Viral vectors**

28 Four viral vectors, including VSV- $\Delta$ G (VSV- $\Delta$ G-Tau-GFP, titer:  $5.0 \times 10^8$  PFU/mL),  
29 lentivirus (lentivirus-UbC-GFP, titer:  $1.33 \times 10^9$  TU/mL), and two constructs of AAV2/9  
30 (AAV2/9-CaMKII $\alpha$ -Tau-GFP, titer:  $8.47 \times 10^{13}$  vg/mL; AAV2/9-hSyn-mCherry, titer:  
31  $1.6 \times 10^{13}$  vg/mL), were tested in this study (Table. 1). AAV2/9 and VSV- $\Delta$ G were

1 purchased from BrainVTA technology Co., Ltd. (Wuhan, China), and lentivirus was  
 2 provided by a coauthor Z.Q.'s laboratory. Here, the recombinant AAV2/9 contained either  
 3 a hSyn or CaMKII $\alpha$  promoter to regulate the expression of either reporter gene mCherry  
 4 in all neurons or fused Tau-GFP protein in glutamatergic excitatory neurons, respectively.  
 5 Regarding the VSV vector, G protein was deleted to prevent transsynaptic spread. The last  
 6 tested viral vector, Ubic promoter-driven lentivirus, expressed GFP in all eukaryotic cells.

7

8 **Table 1 Injection cases and viral vectors used in this study.** Abbreviations: M, male; F, female. MD,  
 9 mediodorsal thalamus; vIPFC, ventrolateral prefrontal cortex; UbC, human ubiquitin C; hSyn, human  
 10 synapsin I; CaMKII, Ca<sup>2+</sup>/calmodulin dependent protein kinase II; d, day.

| ID  | Species                 | Injection site | Viral vector                    | Expression time |
|-----|-------------------------|----------------|---------------------------------|-----------------|
| #1  | Macaca mulatta (M)      | Cortex         | VSV- $\Delta$ G-Tau-GFP         | ~5 d            |
|     |                         | MD             | VSV- $\Delta$ G-Tau-GFP         | ~5 d            |
| #2  | Macaca mulatta (M)      | Cortex         | VSV- $\Delta$ G-Tau-GFP         | ~25 d           |
|     |                         | MD             | VSV- $\Delta$ G-Tau-GFP         | ~90 d           |
| #3  | Macaca fascicularis (M) | Cortex         | AAV2/9-CaMKII $\alpha$ -Tau-GFP | ~45 d           |
|     |                         | Cortex         | AAV2/9-hSyn- mCherry            | ~45 d           |
|     |                         | Cortex         | Lenti-UbC-GFP                   | ~260 d          |
|     |                         | MD             | Lenti-UbC-GFP                   | ~260 d          |
| #4  | Macaca fascicularis (M) | MD             | AAV2/9-CaMKII $\alpha$ -Tau-GFP | ~60 d           |
| #5  | Macaca fascicularis (M) | MD             | AAV2/9-CaMKII $\alpha$ -Tau-GFP | ~60 d           |
| #6  | Macaca fascicularis (F) | MD             | AAV2/9-CaMKII $\alpha$ -Tau-GFP | ~60 d           |
| #7  | Macaca fascicularis (M) | vIPFC          | AAV2/9-CaMKII $\alpha$ -Tau-GFP | ~75 d           |
| #8  | Macaca fascicularis (F) | vIPFC          | AAV2/9-CaMKII $\alpha$ -Tau-GFP | ~75 d           |
| #9  | Macaca fascicularis (F) | vIPFC          | AAV2/9-CaMKII $\alpha$ -Tau-GFP | ~90 d           |
| #10 | Macaca fascicularis (F) | \              | \                               | \               |

11

## 12 MRI-guided virus injection, histology and microscopy

13 To precisely target brain regions in individual subjects, we performed in-vivo MRI  
 14 scanning in monkeys<sup>9, 14, 65, 66</sup> and then used MRI images to guide the virus injection (more  
 15 details in Supplementary materials). According to the expression time of individual virus  
 16 (Table 1), animals were deeply anesthetized, and then transcardially perfused with 0.9%  
 17 NaCl (pH = 7.2) followed by ice-cold 4% paraformaldehyde in 0.01 M phosphate buffered

1 saline. Brains were extracted and post-fixed in 4% PFA for 3 days. Cryo-sectioning  
2 combined with wide field microscope imaging and confocal laser microscope imaging was  
3 performed for virus testing and more details were provided in Supplementary materials.  
4 Fluorescence signals of AAV labeled areas were detected and recorded using a customized  
5 STP tomography (Fig. S8, Supplementary materials). High x-y resolution (0.95  $\mu\text{m}/\text{pixel}$ )  
6 serial 2D images were acquired at a z-interval of 200  $\mu\text{m}$  across the entire macaque brain,  
7 as resulted in a continuous  $\sim 1$  month scanning and  $\sim 5$  TB STP tomography data for one  
8 monkey brain (Fig. S9). Once finished scanning, all sections were retrieved from the  
9 cutting bath and stored in cryo protection solution (containing 30% glycol, 30% sucrose in  
10 PBS) at  $-20^\circ\text{C}$  for further histological examination.

11

## 12 **Fluorescence image preprocessing**

13 Fluorescent images of the macaque brain usually contain strong autofluorescence signal  
14 (Fig. S10 A-E), mainly caused by the accumulation of lipofuscin<sup>67</sup>. Autofluorescence  
15 provides good contrast between gray matter and white matter, which is rather useful for  
16 image registration. But the presence of autofluorescence is undesirable for the axon tracing  
17 procedure since this background signal sometimes is much stronger than that of some thin  
18 GFP labeled axons (Fig. S10 A-E). Nevertheless, thanks to the broad emission spectrum of  
19 lipofuscin<sup>68</sup>, autofluorescence and GFP signals are easily distinguishable from each other.  
20 We therefore implemented and compared the following three methods for background  
21 reduction: (1) transforming the GFP signal from the green channel (488 nm) to the blue  
22 channel (405 nm) using immunofluorescent staining (Fig. S10M), (2) subtracting the  
23 normalized autofluorescence signal in the red channel from the green channel (Fig. S10F),  
24 which contains both GFP signal and autofluorescence background signal, (3) supervised  
25 machine learning for autofluorescence exclusion (Fig. S10J).

26 The first method involved staining the brain tissue with anti-GFP antibody and Alexa  
27 Fluor 405 conjugated secondary antibody to transform the GFP signal from green channel  
28 to blue channel. Unlike the green and red channels, the transferred blue channel (Fig. S10M)  
29 did not contain high intensity autofluorescence puncta. Although this post-hoc thick-  
30 section immunofluorescent method successfully reduced autofluorescence, it was  
31 incompatible with the block face imaging method. The second one was to subtract the



1 normalized red channel from the green channel using the broad emission spectrum  
2 characteristic of autofluorescence puncta, which was able to remove high intensity  
3 background signal (Fig. S10F). The third was based on a supervised machine learning  
4 plugin for ImageJ, trainable WEKA segmentation<sup>69</sup>, which classifies and binarizes GFP  
5 and autofluorescence background signal for background exclusion (Fig. S10J). Both  
6 subtraction and machine learning methods were used for better visualization of  
7 fluorescence images when necessary, whereas only the supervised machine learning  
8 approach was used for quantitative analysis of STP data<sup>68</sup>.

9

## 10 **STP image processing**

11 STP tomography data processing included axonal fiber detection, image stitching, down  
12 sampling, cross-modality registration and quantification. The GFP labelled axonal fibers  
13 were segmented by using a machine learning algorithm to remove background. During STP  
14 tomography scanning, each field of view (FOV) was saved as a 1024 × 1024-pixel image.  
15 For image stitching, individual FOV images from red channel, green channel and  
16 segmented GFP signal were stitched into full tissue sections using the TeraStitcher software.  
17 A convolutional neural network-based denoising approach was used to improve SNR of  
18 images when necessary<sup>70</sup>. The natural alignment of serial images generated by STP  
19 tomography allowed to stack the section images to form a coherent reconstructed 3D  
20 volume<sup>33</sup>. In order to localize the virus injection site, a threshold was set at green channel  
21 to retain the fluorescence signal only from the cell soma for each section image. Images of  
22 the red channel and injection site volumes were downsampled to a resolution of 200 × 200  
23 × 200 μm grid. For serial segmented GFP images, the total signal intensity was computed  
24 for each 200 × 200 μm grid by summing the number of signal-positive pixels in that voxel.  
25 Red channel volume was used to perform registration to the monkey brain template, as red  
26 channel images contain visible anatomical information of brain structures<sup>71</sup>. The brain  
27 template of cynomolgus macaque was adopted from an MRI-based atlas generated from  
28 162 cynomolgus monkeys<sup>66</sup>. We warped the red channel volume to the template space by  
29 using a symmetric normalization (SyN) algorithm in ANTs (Fig. S11). The cortical label  
30 was adopted from the D99 parcellation map<sup>72</sup>, and subcortical label was adopted from  
31 INIA19 parcellation map<sup>73</sup>. Also the segmented GFP volume and injection site volume

1 were co-registered onto the same template. Density of GFP signal and total GFP volume in  
2 each parcellated brain region were used to represent the axonal connectivity strength.  
3 Percent of total projection was defined by the GFP-positive pixel count within each  
4 parcellated brain region (or brain lobe) normalized to the total of all GFP-positive pixels.  
5 Additionally, the percent innervation density was calculated as the proportion of density of  
6 GFP pixel counts covering the maximal density of GFP pixel counts of the brain. To create  
7 plots that display the data along the anterior-posterior axis (e.g. % density innervation), the  
8 location of ear bar zero was used as the origin. The percent innervation density of each  
9 cortical region innervated by vIPFC was rendered onto a brain surface.

10

### 11 **Ex-vivo MRI scanning and data preprocessing**

12 We collected dMRI data using an 11.7 T horizontal MRI system (Bruker Biospec 117/16  
13 USR, Ettlingen, Germany), equipped with a 72 mm volume resonator and an actively  
14 shielded, high performance BGA-S series gradient system (gradient strength: 740 mT/m,  
15 slew rate: 6660T/m/s). The paraformaldehyde-fixed macaque brain has immersed in  
16 gadolinium MR contrast agent (Magnevist®, Bayer Pharma AG, Germany) mixed with  
17 phosphate buffered saline (PBS) solution two weeks before MRI scanning. Then the brain  
18 was positioned securely in the close-fitting designed container filled with FOMBLIN®  
19 perfluoropolyether (Solvay Solexis Inc. Thorofare, NJ, USA). Air bubbles were removed  
20 with vacuum pump for 24 h before scanning. Diffusion MRI data were acquired using a  
21 3D diffusion weighted spin echo pulse sequence with single-line read-out, containing 60  
22 diffusion gradient directions ( $b = 4000 \text{ s/mm}^2$ ) and 5 non-diffusion-weighted ( $b = 0 \text{ s/mm}^2$ ).  
23 The scanning parameters were set: TR/TE = 82/22.19 ms, FOV = 64×54 mm, acquisition  
24 matrix = 128×108, slice thickness = 0.5 mm, and averages = 3. In addition, whole brain  
25 T1-weighted and T2-weighted structural images were obtained using 3D FLASH and 2D  
26 Turbo RARE sequences, respectively. All scanning was performed at room temperature  
27 (approximately 20 °C) and the total scan time was approximately 36 hours. The dMRI data  
28 was preprocessed using the FSL software (<http://www.fmrib.ox.ac.uk/fsl>)<sup>74</sup>. Individual  
29 image volumes were co-registered with  $b = 0$  images to account for eddy currents and B0  
30 drift using affine registration in FLIRT<sup>75</sup>. A custom in-house script was applied to reorient  
31 the corresponding gradient direction matrix. Careful steps have been taken to minimize

1 artifacts caused by motion and field distortion, and image correction was applied only if  
2 necessary<sup>76, 77</sup>. More details of data acquisition and preprocessing were described in  
3 Supplementary materials.

4

### 5 **Reconstruction and comparison of diffusion tractography and axonal tracing**

6 We first identified the injection-site volume in the vLPFC in STP tomography data, warped  
7 it to the space of dMRI volume and used it as a seed mask for tractography. Then the  
8 injection site related tractography was constructed using the preprocessed dMRI images in  
9 FSL toolbox. BEDPOSTX was used for Bayesian estimation of a crossing fiber model with  
10 three-fiber orientation structure for each voxel using Markov chain-Monte Carlo  
11 sampling<sup>74</sup>. This provided a voxel-wise estimate of the angular distribution of local tract  
12 direction for each fiber, which was a starting point for tractography. Tractography was then  
13 performed from the injection-site seed masks without waypoint mask and termination mask  
14 using the Probtrackx probabilistic tractography software<sup>74</sup>. A probabilistic map of fiber  
15 tracts was generated with 500  $\mu\text{m}$  isotropic resolution. A probabilistic map provided, at  
16 each voxel, a connectivity value, corresponding to the total number of samples that passed  
17 from the seed region through that voxel. The following settings were used: number of  
18 samples per voxel = 5000, number of steps per sample = 2000, step length = 0.2 mm, loop  
19 check, default curvature threshold = 0.2 (corresponding to a minimum angle of  
20 approximately  $\pm 80$  degrees), subsidiary fiber volume threshold = 0.01, seed sphere  
21 sampling = 0 and no way-point or termination mask. In the resulting map, each voxel's  
22 value represented the degree of connectivity between it and the seed voxels. To generate  
23 dMRI-derived fiber tracts, the resulting probabilistic maps were set at 0.2% threshold of  
24 total number, i.e., any voxel below threshold was set to zero. In parallel, segmented  
25 fluorescence images from the STP tomography data were downsampled to 500  $\mu\text{m}$  grid to  
26 generate axonal density maps. The signal intensity of an axonal density map was computed  
27 for each  $500 \times 500 \mu\text{m}^2$  grid by summing the number of GFP-positive pixels within that  
28 area. Note that the axonal density map was also filtered by setting an intensity threshold of  
29  $10^{3.2}$  to minimize false positives due to segmentation artefacts<sup>4</sup>. After co-registered the  
30 probabilistic maps and the axonal density maps onto the same template, both Dice

1 coefficients and pixel-wise Pearson coefficients were calculated to quantitatively assess the  
2 spatial overlap<sup>78,79</sup>.

3 As described recently<sup>63</sup>, the inferior fronto-occipital fasciculus was reconstructed  
4 using streamline-based probabilistic tractography. We ran this probabilistic tractography  
5 tool in MRTrax3 ([www.mrtrix.org](http://www.mrtrix.org)) via bootstrapping<sup>80</sup>. Streamlines were seeded over the  
6 whole brain area that encapsulated the tract of interest. Two inclusion masks were used to  
7 define two regions that each tract must pass through, and only streamlines that pass through  
8 both regions are retained. One exclusion mask was used to restrict tracking to the  
9 contralateral hemisphere of the brain. The inclusion and exclusion masks were drawn  
10 manually as described previously<sup>63</sup>: the first mask was placed on the anterior border of the  
11 occipital lobe in the coronal view, the second mask was placed on the external/extreme  
12 capsules in the coronal view and the third mask was cover the whole left hemisphere as the  
13 exclusion mask. The delineation process was performed using the MRIcro  
14 ([www.mricro.com](http://www.mricro.com)) software. Using this “waypoint” method, the resultant streamlines were  
15 able to meet our preset conditions. More details of streamline-based probabilistic  
16 tractography processing were described in Supplementary materials. To further reduce  
17 false positive tracts, any streamlines that were identified as either attached to other tracts  
18 or anatomically implausible trajectories were manually removed. For a direct comparison  
19 between diffusion-derived the IFOF tract and vIPFC projection fibers, we first generated  
20 the track density images of the IFOF tract and co-registered them onto the space of the  
21 template. The spatial overlap of GFP-positive vIPFC projection fibers and the IFOF tract  
22 were then detected with using ImageJ and FSL software in both 2D and 3D space (Fig. 7B).  
23 The Szymkiewicz-Simpson overlap coefficient was adopted to quantify the spatial  
24 relationship between the IFOF tract and vIPFC projectome, which was defined as the size  
25 of the union of them over the size of the smaller set:

$$\text{overlap}_{(\text{IFOF}, \text{vIPFC})} = \frac{|\text{IFOF} \cap \text{vIPFC}|}{\min(|\text{IFOF}|, |\text{vIPFC}|)}$$

26  
27 The Szymkiewicz-Simpson overlap coefficient ranges from 0 (no overlap) to 1 (if the  
28 IFOF tract is found in its entirety in vIPFC projectome).

29

### 30 **Materials availability**

31 All the virus vectors used in this paper are available from the authors for sample test.

1

## 2 **Data Availability**

3 There is no institutional resource for hosting such big connectome data. Therefore we  
4 host it ourselves on a publicly accessible FTP secure server, ftp://192.168.220.53 via  
5 VPN https://119.78.67.35:666, login: ftpuser1, password: ftp@user1. We commit to  
6 keeping it available for at least 5 years, and provide alternative procedures where users  
7 can copy any or all of it to their own computer.

8

## 9 **Acknowledgments**

10 We would like to thank Jinqiang Peng and Jie Xu for their assistance to data acquisition,  
11 and thank Drs. John Gore, Ed Callaway and Anna Roe for their stimulating discussions  
12 and suggestions during the preparation of this study. This work was supported by the Key-  
13 Area Research and Development Program of Guangdong Province (2019B030335001),  
14 National Key R&D Program of China (No. 2017YFC1310400; No. 2018YFC1313803),  
15 the Strategic Priority Research Program of Chinese Academy of Science (No.  
16 XDB32000000), grants from National Natural Science Foundation (31771174), and  
17 Shanghai Municipal Science and Technology Major Project (No. 2018SHZDZX05).

18

19 **Author Contributions:** Y.M.C., L.Q., L.Q.M., B.T.T., C.X.Y., L.Y.L., Z.Y.F., and Y.S.Y.  
20 participated in-vivo MRI scanning and virus injection experiments. Y.M.C. with the help  
21 of L.Q., L.Q.M., and S.X.Y. performed immunohistology and STP experiments and  
22 processed data. Y.W.W. performed ex-vivo MRI experiment with the help of Y.B.F.,  
23 Z.X.Y., W.H., and processed data with the help of L.Q., L.Q.M., and F.Y.J. X.F.Q. and  
24 Q.Z.L. designed and prepared the viral vectors. W.Z., Y.M.C. and X.F.Q. designed the  
25 study and W.Z. supervised the study. Y.M.C., Y.W.W. and W.Z. prepared the manuscript  
26 with input from all of the authors.

27 **Competing Interest Statement:** The authors declare no competing financial interests.

28

## 1 References

- 2 1. Neubert FX, Mars RB, Thomas AG, Sallet J, Rushworth MF. Comparison of human  
3 ventral frontal cortex areas for cognitive control and language with areas in monkey  
4 frontal cortex. *Neuron* **81**, 700-713 (2014).
- 5 2. Carlén M. What constitutes the prefrontal cortex? *Science* **358**, 478-482 (2017).
- 6 3. Borra E, Gerbella M, Rozzi S, Luppino G. Anatomical evidence for the involvement of  
7 the macaque ventrolateral prefrontal area 12r in controlling goal-directed actions. *J.*  
8 *Neurosci.* **31**, 12351-12363 (2011).
- 9 4. Oh SW, *et al.* A mesoscale connectome of the mouse brain. *Nature* **508**, 207-214 (2014).
- 10 5. Zingg B, *et al.* Neural Networks of the Mouse Neocortex. *Cell* **156**, 1096-1111 (2014).
- 11 6. Saleem KS, Miller B, Price JL. Subdivisions and connectional networks of the lateral  
12 prefrontal cortex in the macaque monkey. *J. Comp. Neurol.* **522**, 1641-1690 (2014).
- 13 7. Sakagami M, Pan X. Functional role of the ventrolateral prefrontal cortex in decision  
14 making. *Curr. Opin. Neurobiol.* **17**, 228-233 (2007).
- 15 8. Levy BJ, Wagner AD. Cognitive control and right ventrolateral prefrontal cortex:  
16 reflexive reorienting, motor inhibition, and action updating. *Ann. N. Y. Acad. Sci.* **1224**,  
17 40-62 (2011).
- 18 9. Cai D-C, *et al.* MECP2 Duplication Causes Aberrant GABA Pathways, Circuits and  
19 Behaviors in Transgenic Monkeys: Neural Mappings to Patients with Autism. *J.*  
20 *Neurosci.* **40**, 3799-3814 (2020).
- 21 10. Zhan Y, *et al.* Diagnostic Classification for Human Autism and Obsessive-Compulsive  
22 Disorder Based on Machine Learning From a Primate Genetic Model. *Am. J. Psychiatry*  
23 **178**, 65-76 (2021).
- 24 11. Haber SN, *et al.* Circuits, Networks, and Neuropsychiatric Disease: Transitioning From  
25 Anatomy to Imaging. *Biol. Psychiatry* **87**, 318-327 (2020).
- 26 12. Zeng H. Mesoscale connectomics. *Curr. Opin. Neurobiol.* **50**, 154-162 (2018).
- 27 13. Glasser MF, *et al.* The Human Connectome Project's neuroimaging approach. *Nat.*  
28 *Neurosci.* **19**, 1175-1187 (2016).
- 29 14. Wang Z, *et al.* The relationship of anatomical and functional connectivity to resting-state  
30 connectivity in primate somatosensory cortex. *Neuron* **78**, 1116-1126 (2013).
- 31 15. Basser PJ, Mattiello J, LeBihan D. MR diffusion tensor spectroscopy and imaging.  
32 *Biophys. J.* **66**, 259-267 (1994).
- 33 16. Wedeen VJ, *et al.* The geometric structure of the brain fiber pathways. *Science* **335**,  
34 1628-1634 (2012).
- 35 17. Mori S, Zhang J. Principles of diffusion tensor imaging and its applications to basic  
36 neuroscience research. *Neuron* **51**, 527-539 (2006).
- 37 18. Donahue CJ, *et al.* Using Diffusion Tractography to Predict Cortical Connection Strength  
38 and Distance: A Quantitative Comparison with Tracers in the Monkey. *J. Neurosci.* **36**,  
39 6758-6770 (2016).
- 40 19. Maier-Hein KH, *et al.* The challenge of mapping the human connectome based on  
41 diffusion tractography. *Nat. Commun.* **8**, 1349 (2017).
- 42 20. Luo L, Callaway EM, Svoboda K. Genetic Dissection of Neural Circuits: A Decade of  
43 Progress. *Neuron* **98**, 256-281 (2018).
- 44 21. Bienkowski MS, *et al.* Integration of gene expression and brain-wide connectivity reveals  
45 the multiscale organization of mouse hippocampal networks. *Nat. Neurosci.* **21**, 1628-  
46 1643 (2018).
- 47 22. Schmahmann JD, *et al.* Association fibre pathways of the brain: parallel observations  
48 from diffusion spectrum imaging and autoradiography. *Brain* **130**, 630-653 (2007).

- 1 23. Reveley C, *et al.* Superficial white matter fiber systems impede detection of long-range  
2 cortical connections in diffusion MR tractography. *Proc. Natl. Acad. Sci. U. S. A.* **112**,  
3 E2820-2828 (2015).
- 4 24. Mortazavi F, *et al.* Geometric Navigation of Axons in a Cerebral Pathway: Comparing  
5 dMRI with Tract Tracing and Immunohistochemistry. *Cereb. Cortex* **28**, 1219-1232  
6 (2018).
- 7 25. Folloni D, Sallet J, Khrapitchev AA, Sibson N, Verhagen L, Mars RB. Dichotomous  
8 organization of amygdala/temporal-prefrontal bundles in both humans and monkeys.  
9 *Elife* **8**, (2019).
- 10 26. Dyrby TB, Innocenti GM, Bech M, Lundell H. Validation strategies for the interpretation  
11 of microstructure imaging using diffusion MRI. *Neuroimage* **182**, 62-79 (2018).
- 12 27. Han X, *et al.* Millisecond-timescale optical control of neural dynamics in the nonhuman  
13 primate brain. *Neuron* **62**, 191-198 (2009).
- 14 28. Nassi JJ, Cepko CL, Born RT, Beier KT. Neuroanatomy goes viral! *Front. Neuroanat.* **9**,  
15 80 (2015).
- 16 29. Albanese A, Chung K. Whole-brain imaging reaches new heights (and lengths). *Elife* **5**,  
17 e13367 (2016).
- 18 30. Bedbrook CN, Deverman BE, Gradinaru V. Viral Strategies for Targeting the Central and  
19 Peripheral Nervous Systems. *Annu. Rev. Neurosci.* **41**, 323-348 (2018).
- 20 31. Stauffer WR, *et al.* Dopamine Neuron-Specific Optogenetic Stimulation in Rhesus  
21 Macaques. *Cell* **166**, 1564-1571 e1566 (2016).
- 22 32. Suarez LE, Markello RD, Betzel RF, Misic B. Linking Structure and Function in  
23 Macroscale Brain Networks. *Trends. Cogn. Sci.* **24**, 302-315 (2020).
- 24 33. Ragan T, *et al.* Serial two-photon tomography for automated ex vivo mouse brain  
25 imaging. *Nat. Methods.* **9**, 255-258 (2012).
- 26 34. Li A, *et al.* Micro-optical sectioning tomography to obtain a high-resolution atlas of the  
27 mouse brain. *Science* **330**, 1404-1408 (2010).
- 28 35. Forkel SJ, Thiebaut de Schotten M, Kawadler JM, Dell'Acqua F, Danek A, Catani M.  
29 The anatomy of fronto-occipital connections from early blunt dissections to  
30 contemporary tractography. *Cortex* **56**, 73-84 (2014).
- 31 36. Amato SP, Pan F, Schwartz J, Ragan TM. Whole Brain Imaging with Serial Two-Photon  
32 Tomography. *Front. Neuroanat.* **10**, 31 (2016).
- 33 37. Gerbella M, Belmalih A, Borra E, Rozzi S, Luppino G. Cortical connections of the  
34 macaque caudal ventrolateral prefrontal areas 45A and 45B. *Cereb. Cortex* **20**, 141-168  
35 (2010).
- 36 38. Safadi Z, *et al.* Functional Segmentation of the Anterior Limb of the Internal Capsule:  
37 Linking White Matter Abnormalities to Specific Connections. *J. Neurosci.* **38**, 2106-2117  
38 (2018).
- 39 39. Borra E, Gerbella M, Rozzi S, Luppino G. Projections from caudal ventrolateral  
40 prefrontal areas to brainstem preoculomotor structures and to Basal Ganglia and  
41 cerebellar oculomotor loops in the macaque. *Cereb. Cortex* **25**, 748-764 (2015).
- 42 40. Bakker R, Wachtler T, Diesmann M. CoCoMac 2.0 and the future of tract-tracing  
43 databases. *Front. Neuroinform.* **6**, 30 (2012).
- 44 41. Stephan KE. The history of CoCoMac. *Neuroimage* **80**, 46-52 (2013).
- 45 42. Beier KT, *et al.* Anterograde or retrograde transsynaptic labeling of CNS neurons with  
46 vesicular stomatitis virus vectors. *Proc. Natl. Acad. Sci. U. S. A.* **108**, 15414-15419  
47 (2011).
- 48 43. Mundell NA, *et al.* Vesicular stomatitis virus enables gene transfer and transsynaptic  
49 tracing in a wide range of organisms. *J. Comp. Neurol.* **523**, 1639-1663 (2015).
- 50 44. Naldini L, *et al.* In vivo gene delivery and stable transduction of nondividing cells by a  
51 lentiviral vector. *Science* **272**, 263-267 (1996).

- 1 45. Schambach A, Zychlinski D, Ehrnstroem B, Baum C. Biosafety features of lentiviral  
2 vectors. *Hum. Gene Ther.* **24**, 132-142 (2013).
- 3 46. Cui Y, Li X, Zeljic K, Shan S, Qiu Z, Wang Z. Effect of PEGylated Magnetic PLGA-PEI  
4 Nanoparticles on Primary Hippocampal Neurons: Reduced Nanoneurotoxicity and  
5 Enhanced Transfection Efficiency with Magnetofection. *ACS Appl. Mater. Interfaces* **11**,  
6 38190-38204 (2019).
- 7 47. Watakabe A, *et al.* Comparative analyses of adeno-associated viral vector serotypes 1, 2,  
8 5, 8 and 9 in marmoset, mouse and macaque cerebral cortex. *Neurosci. Res.* **93**, 144-157  
9 (2015).
- 10 48. Calabrese E, Badea A, Cofer G, Qi Y, Johnson GA. A Diffusion MRI Tractography  
11 Connectome of the Mouse Brain and Comparison with Neuronal Tracer Data. *Cereb.*  
12 *Cortex* **25**, 4628-4637 (2015).
- 13 49. van den Heuvel MP, *et al.* Comparison of diffusion tractography and tract-tracing  
14 measures of connectivity strength in rhesus macaque connectome. *Hum. Brain. Mapp.* **36**,  
15 3064-3075 (2015).
- 16 50. Girard G, *et al.* On the cortical connectivity in the macaque brain: A comparison of  
17 diffusion tractography and histological tracing data. *Neuroimage* **221**, 117201 (2020).
- 18 51. Chang EH, *et al.* The role of myelination in measures of white matter integrity:  
19 Combination of diffusion tensor imaging and two-photon microscopy of CLARITY intact  
20 brains. *Neuroimage* **147**, 253-261 (2017).
- 21 52. Harsan LA, *et al.* Mapping remodeling of thalamocortical projections in the living reeler  
22 mouse brain by diffusion tractography. *Proc. Natl. Acad. Sci. U. S. A.* **110**, E1797-1806  
23 (2013).
- 24 53. Chen H, *et al.* Optimization of large-scale mouse brain connectome via joint evaluation  
25 of DTI and neuron tracing data. *Neuroimage* **115**, 202-213 (2015).
- 26 54. Dauguet J, *et al.* Comparison of fiber tracts derived from in-vivo DTI tractography with  
27 3D histological neural tract tracer reconstruction on a macaque brain. *Neuroimage* **37**,  
28 530-538 (2007).
- 29 55. Markov NT, *et al.* A weighted and directed interareal connectivity matrix for macaque  
30 cerebral cortex. *Cereb. Cortex* **24**, 17-36 (2014).
- 31 56. D'Arceuil HE, Westmoreland S, de Crespigny AJ. An approach to high resolution  
32 diffusion tensor imaging in fixed primate brain. *Neuroimage* **35**, 553-565 (2007).
- 33 57. Curran EJ. A new association fiber tract in the cerebrum. With remarks on the fiber tract  
34 dissection method of studying the brain. *J. Comp. Neurol.* **19**, 645-U648 (1909).
- 35 58. Takemura H, *et al.* Occipital White Matter Tracts in Human and Macaque. *Cereb. Cortex*  
36 **27**, 3346-3359 (2017).
- 37 59. Hau J, *et al.* Cortical Terminations of the Inferior Fronto-Occipital and Uncinate  
38 Fasciculi: Anatomical Stem-Based Virtual Dissection. *Front. Neuroanat.* **10**, 58 (2016).
- 39 60. Sarubbo S, Petit L, De Benedictis A, Chioffi F, Ptito M, Dyrby TB. Uncovering the  
40 inferior fronto-occipital fascicle and its topological organization in non-human primates:  
41 the missing connection for language evolution. *Brain Struct. Funct.* **224**, 1553-1567  
42 (2019).
- 43 61. Feng L, *et al.* Population-averaged macaque brain atlas with high-resolution ex vivo DTI  
44 integrated into in vivo space. *Brain Struct. Funct.* **222**, 4131-4147 (2017).
- 45 62. Petrides M. Neuroanatomy of language regions of the human brain. *Academic Press*,  
46 (2013).
- 47 63. Barrett RLC, *et al.* Differences in Frontal Network Anatomy Across Primate Species. *J.*  
48 *Neurosci.* **40**, 2094-2107 (2020).
- 49 64. Liu D, *et al.* Orbitofrontal control of visual cortex gain promotes visual associative  
50 learning. *Nat. Commun.* **11**, 2784 (2020).



- 1 65. Lv Q, *et al.* Large-Scale Persistent Network Reconfiguration Induced by Ketamine in  
2 Anesthetized Monkeys: Relevance to Mood Disorders. *Biol. Psychiatry* **79**, 765-775  
3 (2016).
- 4 66. Lv QM, *et al.* Normative analysis of individual brain differences based on a population  
5 MRI-based atlas of cynomolgus macaques. *Cereb. Cortex*, (2020).
- 6 67. Economo MN, *et al.* A platform for brain-wide imaging and reconstruction of individual  
7 neurons. *Elife* **5**, e10566 (2016).
- 8 68. Hunnicutt BJ, Jongbloets BC, Birdsong WT, Gertz KJ, Zhong H, Mao T. A  
9 comprehensive excitatory input map of the striatum reveals novel functional  
10 organization. *Elife* **5**, (2016).
- 11 69. Arganda-Carreras I, *et al.* Trainable Weka Segmentation: a machine learning tool for  
12 microscopy pixel classification. *Bioinformatics* **33**, 2424-2426 (2017).
- 13 70. Krull A, Buchholz T-O, Jug F. Noise2Void - Learning Denoising from Single Noisy  
14 Images. Preprint at <https://arxiv.org/abs/1811.10980> (2018).
- 15 71. Kuan L, *et al.* Neuroinformatics of the Allen Mouse Brain Connectivity Atlas. *Methods*  
16 **73**, 4-17 (2015).
- 17 72. Reveley C, *et al.* Three-Dimensional Digital Template Atlas of the Macaque Brain.  
18 *Cereb. Cortex* **27**, 4463-4477 (2017).
- 19 73. Rohlfing T, *et al.* The INIA19 Template and NeuroMaps Atlas for Primate Brain Image  
20 Parcellation and Spatial Normalization. *Front. Neuroinform.* **6**, 27 (2012).
- 21 74. Behrens TE, Berg HJ, Jbabdi S, Rushworth MF, Woolrich MW. Probabilistic diffusion  
22 tractography with multiple fibre orientations: What can we gain? *Neuroimage* **34**, 144-  
23 155 (2007).
- 24 75. Jenkinson M, Smith S. A global optimisation method for robust affine registration of  
25 brain images. *Med. Image Anal.* **5**, 143-156 (2001).
- 26 76. Andersson JLR, Sotiropoulos SN. An integrated approach to correction for off-resonance  
27 effects and subject movement in diffusion MR imaging. *NeuroImage* **125**, 1063-1078  
28 (2016).
- 29 77. Andersson JL, Sotiropoulos SN. Non-parametric representation and prediction of single-  
30 and multi-shell diffusion-weighted MRI data using Gaussian processes. *Neuroimage* **122**,  
31 166-176 (2015).
- 32 78. Dice LR. Measures of the Amount of Ecologic Association between Species. *Ecology* **26**,  
33 297-302 (1945).
- 34 79. Crum WR, Camara O, Hill DL. Generalized overlap measures for evaluation and  
35 validation in medical image analysis. *IEEE Trans. Med. Imaging.* **25**, 1451-1461 (2006).
- 36 80. Jones DK. Tractography gone wild: probabilistic fibre tracking using the wild bootstrap  
37 with diffusion tensor MRI. *IEEE Trans. Med. Imaging.* **27**, 1268-1274 (2008).

38

1 **Supplementary Information for**  
2 **Mapping brain-wide excitatory projectome of primate prefrontal cortex**  
3 **at submicron resolution: relevance to diffusion tractography**

4  
5 Mingchao Yan, Wenwen Yu, Qian Lv, Qiming Lv, Tingting Bo, Xiaoyu Chen, Yilin Liu,  
6 Yafeng Zhan, Shengyao Yan, Xiangyu Shen, Baofeng Yang, Zilong Qiu, Yuanjing Feng,  
7 Xiaoyong Zhang, He Wang, Fuqiang Xu, Zheng Wang\*

8  
9 \*Corresponding author: Zheng Wang

10 Email: [zheng.wang@ion.ac.cn](mailto:zheng.wang@ion.ac.cn)

11

12

13 **This PDF file includes:**

14

15       Supplementary text

16       Figures S1 to S11

17       References

18

## 1 **Supplementary Methods**

### 2 **MRI-guided virus injection**

3 T1 weighted images for each monkey were obtained with a 3T scanner (Siemens Tim Trio,  
4 Erlangen, Germany) under general anesthesia. A detailed description of in-vivo MRI  
5 scanning procedure has been described in our previous studies<sup>1, 2, 3, 4, 5, 6</sup> and briefly  
6 summarized here. Anesthesia was induced by intramuscular injection of ketamine (10 mg  
7 per kg). Deep anesthesia was maintained by isoflurane (1.5-3%) and vital physiological  
8 signals were continuously monitored during MRI scanning. Anatomical scans were  
9 acquired with an MPRAGE sequence using the following parameters: TR = 2300 ms, TE  
10 = 2.8 ms, TI = 1100 ms, spatial resolution 0.5 mm isotropic. The target regions were  
11 localized in each animal by warping the 3D digital atlas of Saleem and Logothetis<sup>7</sup> to the  
12 individual T1 image using a symmetric normalization (SyN) algorithm. The location of the  
13 vIPFC was then calculated with regard to the stereotaxic space.

14 All procedures for virus injection were performed in strict aseptic conditions. The  
15 head of the animal was fixed in a stereotaxic apparatus, within the same coordinate space  
16 as the MRI images. The target area was then labelled and an incision was made to expose  
17 the skull. A burr hole with a 2 mm radius was drilled above the target according to the  
18 calculated coordinates, and the dura was carefully incised to expose the cortical surface.  
19 The viral vector was delivered into the cortex using a 33-gauge Hamilton syringe controlled  
20 by an UltraMicroPump and a micro4 controller (WPI). The injection speed started with  
21 200 nl/min and was increased to 400 nl/min; total injection volume was 10-20  $\mu$ l. After  
22 injection, the needle was retained for at least 15 minutes and drawn back at a rate of  $\sim$ 1  
23 mm/min. The burr hole was then filled with bone wax and the skin was sutured.  
24 Cephalosporin was given for three consecutive days after surgery (25 mg/kg/day, i.m., once  
25 a day).

26

### 27 **Cryo-sectioning**

28 For virus testing, serial sections were cut on a freezing microtome. The fixed brain was  
29 first cut into a block, then equilibrated sequentially in 15% and 30% sucrose in PBS until  
30 it sank to the bottom of the container. A cryostat microtome (Leica CM1950) was used to  
31 serially slice the brain into 50  $\mu$ m sections. Brain slices were preserved in a cryoprotectant

1 solution (containing 30% ethanediol, 30% sucrose in PBS solution, pH = 7.2) for further  
2 immunofluorescence staining and imaging.

3

#### 4 **Serial two-photon tomography**

5 To image the monkey brain, we customized the STP tomography system which was  
6 integrated a two-photon microscope (Bruker) with a vibratome (WPI) (Fig. S8), computer  
7 controlled and fully automated. The XY stage covered a 50\*60 mm<sup>2</sup> area, and the 3D  
8 scanning of Z-volume stacks was achieved with using a stepper motor (Thorlabs) that  
9 traveled over 70 mm. The fixed brain that was embedded with 4% agarose was scanned in  
10 a 3T MRI to obtain ex-vivo T1 images. Using these T1 images as reference, the active  
11 imaged region of each section was determined during STP tomography for improved  
12 imaging efficiency. The embedded brain was then held via a magnetic adaptor to a stepper  
13 motor and immersed in a cutting bath filled with PBS containing 0.1% sodium azide. The  
14 vibratome blade was aligned in parallel with the leading edge of the specimen block. Brain  
15 images were captured from the anterior PFC to posterior V1 in the coronal plane.  
16 Fluorescence signals for the green channel (excitation wavelength light in 920 nm) and red  
17 channel (excitation wavelength light in 1045 nm) were acquired at 30 µm below the cutting  
18 surface through a Nikon 16x Water objective (N.A. = 0.8).

19 During serial scanning, the STP system was fully automated: each optical section was  
20 imaged as a mosaic of fields of view on the block surface as the xy stage moved the brain  
21 under the objective; once an entire section was imaged, the xy stage moved the brain to the  
22 vibratome and cut off a 200 µm section from the top of the sample. The remaining specimen  
23 was then moved back under the objective for imaging the next neighboring plane. Optical  
24 and mechanical sectioning were repeated until the complete brain data was collected.  
25 Hence fluorescent images of the whole monkey brain were continuously acquired (Fig. S9).

26

#### 27 **Histological staining**

28 To perform immunofluorescence procedure, brain slices were incubated in blocking  
29 solution containing 5% BSA and 0.3% Triton X-100 in PBS at room temperature for 2 hr  
30 and then overnight with primary antibodies in PBS containing 3% BSA and 0.3% Triton  
31 X-100 at 4 °C. Slices were rinsed in PBS followed by Alexa Fluor-conjugated secondary

1 antibodies at room temperature for 3 hrs, and DAPI (Cell signaling Cat# 4083s) for 30  
2 mins at room temperature. The following primary antibodies were used: CaMKIIa (1:200,  
3 Abcam, Cat# ab5683, RRID: AB\_305050), GABA (1:200, Abcam Cat# ab8891, RRID:  
4 AB\_306844), NeuN (1:500, Millipore, Cat# MAB377, RRID: AB\_2298772), GFP (1:300,  
5 Thermo Fisher Scientific, Cat# A-11122, RRID: AB\_221569). The following secondary  
6 antibodies were used: Goat anti-Rabbit IgG (H+L) Alexa Fluor 405 (1:500, Thermo Fisher  
7 Scientific, Cat# A31556, RRID: AB\_221605), Donkey anti-Rabbit IgG (H+L) Alexa Fluor  
8 568 (1:600, Thermo Fisher Scientific, Cat# A10042, RRID: AB\_2534017), Goat anti-  
9 Mouse IgG (H+L) Alexa Fluor Plus 647 (1:500, Thermo Fisher Scientific Cat# A32728  
10 RRID: AB\_2633277), Goat anti-Rabbit IgG (H+L) Alexa Fluor 488 (1:300, Thermo Fisher  
11 Scientific, Cat# A11034, RRID: AB\_2576217). The brain slices were mounted onto  
12 customized 2 × 3 inch or 3 × 4 inch glass slides. The sections were then scanned using an  
13 Olympus VS120 (Olympus, Japan), a wide field microscope, with a U Plan Super Apo 10×  
14 objective (N.A. = 0.4) at a resolution of 0.65 μm/pixel. High resolution fluorescent images  
15 were acquired with a confocal laser microscope Nikon TiE (Nikon, Tokyo, Japan) with a  
16 Plan Fluo 40× Oil DIC N2 objective (N.A. = 1.3), 0.5 μm Z-interval, and 1024 × 1024  
17 pixels.

18

### 19 **Ex-vivo diffusion MRI**

20 After a fixation period of ~ 30 days, the whole brain specimen was immersed in a 1:100  
21 dilution of a 1 mmol/mL gadolinium MR contrast agent (Magnevist®, Bayer Pharma AG,  
22 Germany) mixed with phosphate buffered saline (PBS) solution for 14 days. Before MRI  
23 scanning, the specimen was washed and drained of water from the surface, then positioned  
24 into a customized container which was 3D printed for perfect accommodation of the brain  
25 sample. Thus the brain was held steadily during MRI scanning. And the container was filled  
26 with FOMBLIN® perfluoropolyether (Solvay Solexis Inc. Thorofare, NJ, USA) for  
27 susceptibility matching and improved magnetic field homogeneity. The specimen was  
28 degassed with a vacuum pump for 24h under 0.1 atmosphere pressure to remove all air  
29 bubbles in the sample at 20 °C (magnet room temperature). The ex-vivo macaque brain  
30 was scanned on a 11.7 T animal MRI system (Bruker Biospec 117/16 USR, Ettlingen,  
31 Germany), equipped with a 72 mm volume resonator and an actively shielded, high

1 performance BGA-S series gradient system (gradient strength:740 mT/m, slew rate:  
2 6660T/m/s). dMRI images were acquired using a 3D diffusion-weighted spin echo pulse  
3 sequence with single-line read-out, TR/TE = 82/22.19 ms, FOV = 64×54 mm, matrix =  
4 128×108, slice thickness = 0.5 mm and averages = 3, which included 60 diffusion  
5 directions with  $b = 4000 \text{ s/mm}^2$  ( $\Delta/\delta = 15/2.8 \text{ ms}$ , maximum  $b$  value = 4234.97, gradient  
6 amplitude = 97.19 mT/m) and five non-diffusion encoding ( $b = 0 \text{ s/mm}^2$ ) directions. For  
7 the ex-vivo diffusion MRI data acquisition, the  $b$ -value was recommended to set at 4000  
8  $\text{s/mm}^2$ <sup>8, 9</sup>. T2 weighted images were acquired using a 2D Turbo RARE sequence with  
9 TR/TE = 8353.42/28.8 ms, flip angle = 87°, matrix = 450×450, FOV = 54×45 mm, slice  
10 thickness = 0.5mm, and averages = 6. T1 weighted images were acquired using 3D FLASH  
11 sequence with TR/TE = 40/5.5 ms, flip angle = 15°, matrix = 290×225, FOV =58×45 mm,  
12 slice thickness = 0.2 mm, and averages = 4. The total scan time was approximately 36  
13 hours.

14 Visual inspection of MRI data was first performed to ensure that there were no obvious  
15 image artefacts and geometric distortions. Then we calculated the signal-to-noise ratio  
16 (SNR) for typical diffusion images. As diffusion images were acquired by spin warp  
17 imaging (image reconstruction by a 3D Fourier transform) with a volume quadrature coil,  
18 the SNRs were calculated using the “two-region” approach<sup>10, 11</sup>. Specifically, for each  
19 gradient encoding direction, the deep white matter (WM) were extracted in subject-native  
20 diffusion space to represent the signal<sup>12</sup>; a region positioned in the no signal area at the  
21 corner of the image was used to represent the noise. As a rule of thumb, the SNR of  $b = 0$   
22  $\text{s/mm}^2$  images should be minimally larger than 20 for obtaining relatively unbiased  
23 measures of parameters such as FA<sup>13</sup>. Typical SNRs of diffusion images with  $b = 0$  and  $b$   
24 = 4000 in the present study were  $48.34 \pm 8.50$  and  $23.13 \pm 2.05$ , respectively. It allowed a  
25 reliable seed-based 3D reconstruction for diffusion tractography, as illustrated in [Fig. 5](#).

## 26 **Construction of inferior fronto-occipital fasciculus**

27 The streamline-based probabilistic tractography strategy was used to generate the IFOF  
28 tracts in 3D<sup>14</sup>. The fiber orientation distribution function (FOD) was estimated with  
29 MRtrix3 ([www.mrtrix.org](http://www.mrtrix.org))<sup>15</sup> using the *tournier* algorithm for single-tissue Constrained  
30 spherical deconvolution<sup>16</sup>. For fiber tracking, we then used *tckgen* with the *Tensor\_Prob*  
31 tracking algorithm in MRtrix3<sup>17</sup>. Within each image voxel, a residual bootstrap was

1 performed to obtain a unique realisation of the dMRI data in that voxel for each streamline.  
2 These data are then sampled via trilinear interpolation at each streamline step, the diffusion  
3 tensor model is fitted, and the streamline follows the orientation of the principal  
4 eigenvector of that tensor. The following additional tckgen settings and inputs were used:  
5 step size of 0.25 mm, max. angle between successive steps =  $45^\circ$ , max. length = 150 mm,  
6 min. length value set the min. length 10 mm, cutoff FA value = 0.1, b-vectors and b-values  
7 from the diffusion-weighted gradient scheme in the FSL format, b-value scaling  
8 mode = true, maximum number of fibers = 10,000, and unidirectional tracking.  
9

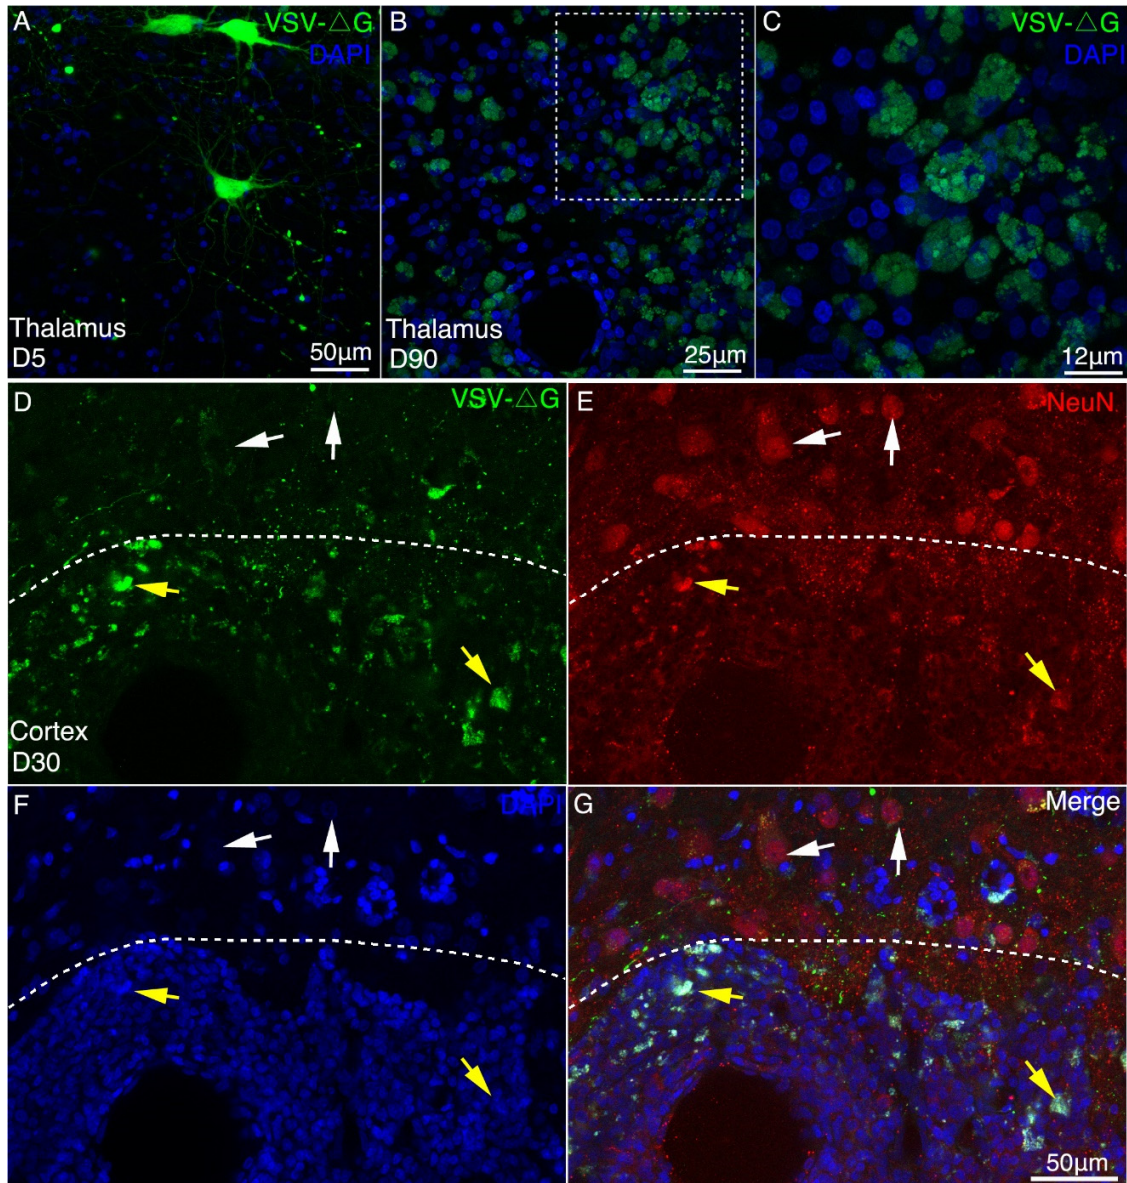

1  
2 **Fig. S1. Long-term expression of VSV- $\Delta$ G induced neurotoxicity in macaque brain.** (A-C)  
3 Compared with the short-term expression (A, 5 days), severe morphological abnormalities such as  
4 neurites loss and membrane blebbing (C), were induced by VSV ( $\Delta$ G) after long-term expression (90  
5 days). (D-G) 30 days after injection of VSV, immunofluorescent staining was performed with NeuN  
6 antibody in the injection site (below the dotted line) and non-injection site (above the dotted line). The  
7 non-infected neurons were found to be EGFP negative and neuronal-specific nuclear protein (NeuN)  
8 positive by immunofluorescent examination. In the injection site, VSV-infected neurons with GFP and  
9 NeuN positive exhibited apparent morphological abnormalities.

10



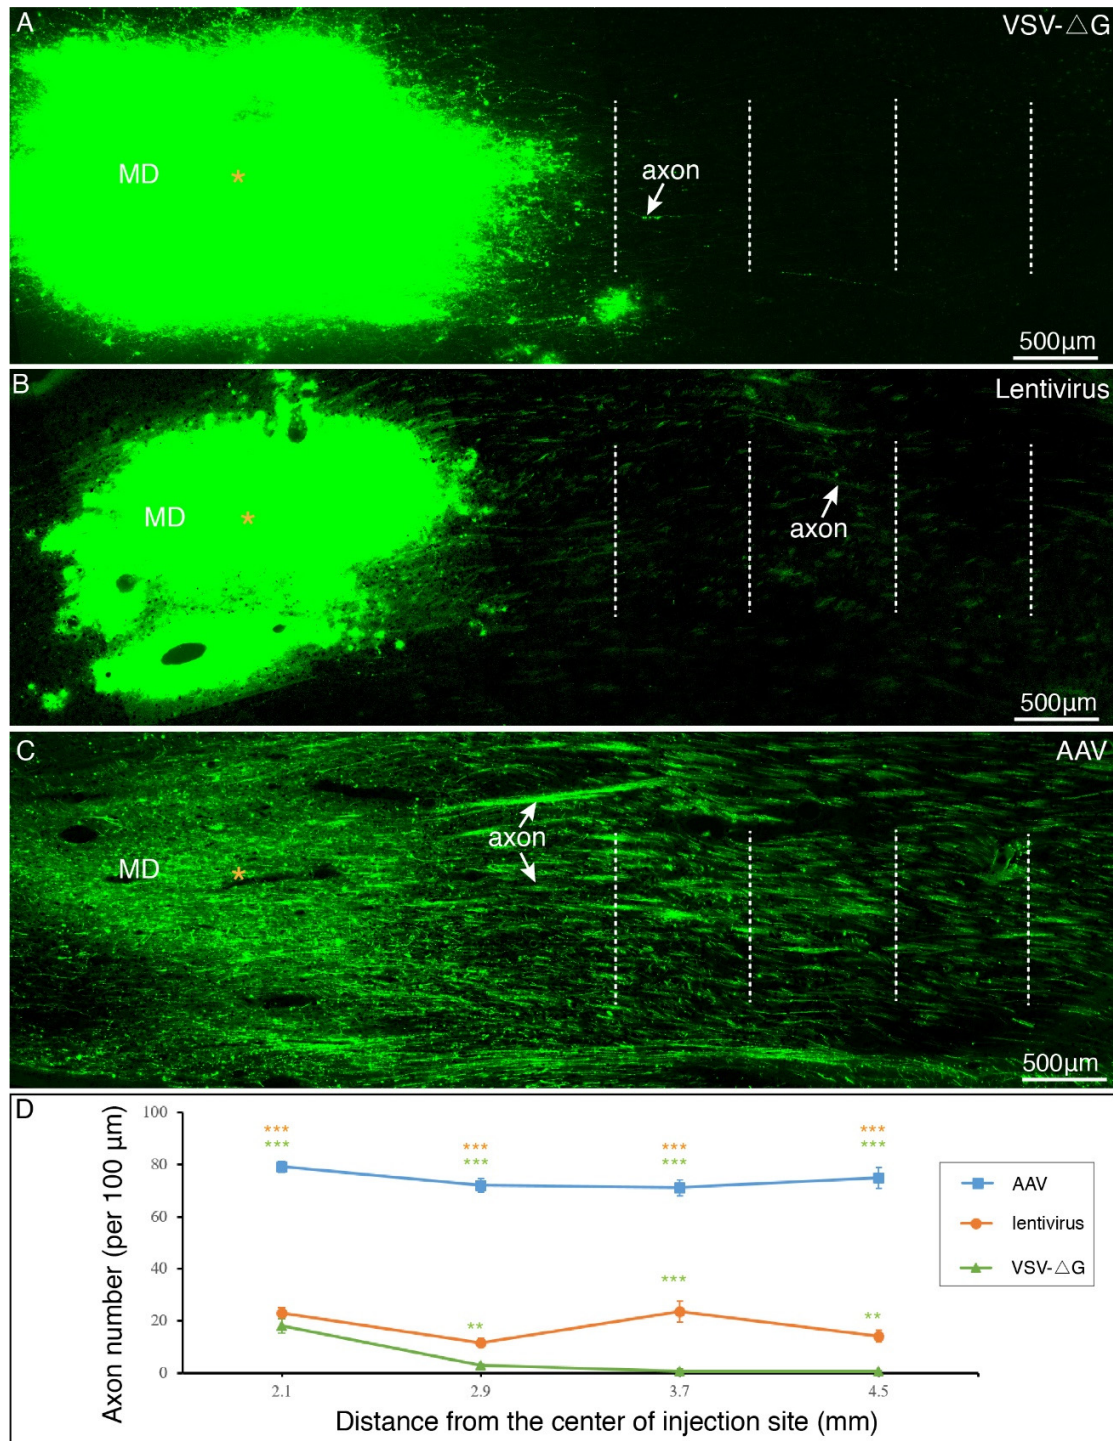

1  
2 **Fig. S2. Long-range axonal tracing outcomes using AAV2/9, lentivirus and VSV- $\Delta$ G.** (A) VSV  
3 rarely labeled long-range axonal fibers issued from MD thalamus. (B) Only sparse axon fibers projecting  
4 from MD thalamus were labeled with using Lentivirus. (C) Robust projecting fibers were detected  
5 distant from the MD thalamus with using AAV2/9. (D) Quantitative comparisons among three viral

1 vectors. The number of GFP-labeled axons was counted at each dotted line in a-c, and subject to One-  
2 way ANOVA followed by Bonferroni Correction. \*\*p < 0.01; \*\*\*p < 0.001; error bars represent SEM.  
3

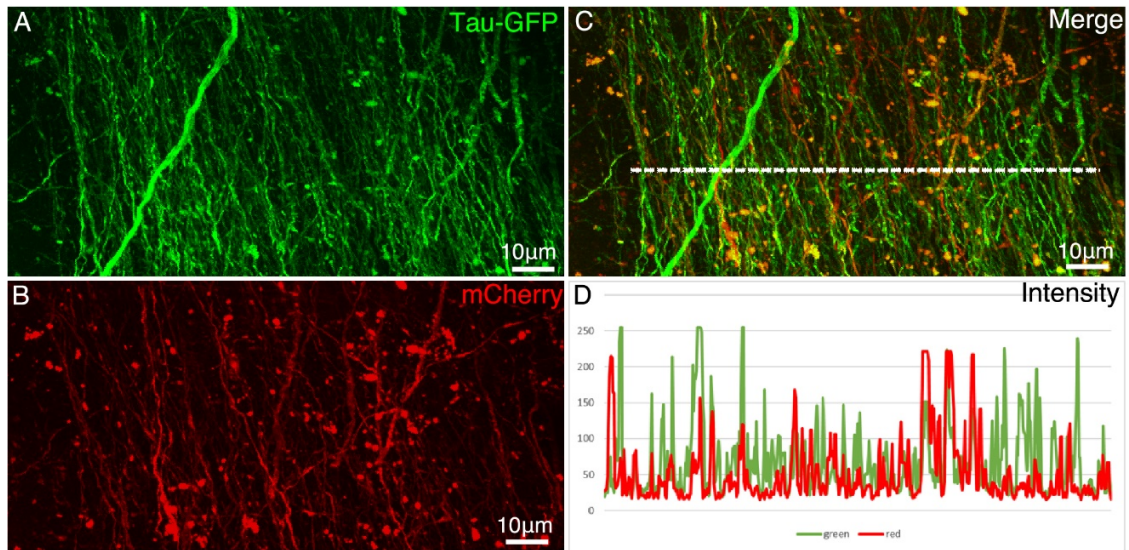

1  
2 **Fig. S3. Comparison of two AAV constructs.** AAV2/9 encoding Tau-GFP and AAV2/9 encoding  
3 mCherry were co-injected in the premotor cortex. Figures **A** and **B** show the axon fibers labeled by Tau-  
4 GFP and mCherry, respectively. (**C**) Colocalization of mCherry and GFP in the axonal fibers. (**D**) The  
5 intensity profiles (measured using ImageJ on 8-bit TIF images) along the dashed line (in C) in red and  
6 green channels. After normalization, a direct comparison indicates that the intensity of Tau-GFP was  
7 stronger than that of mCherry.

8  
9

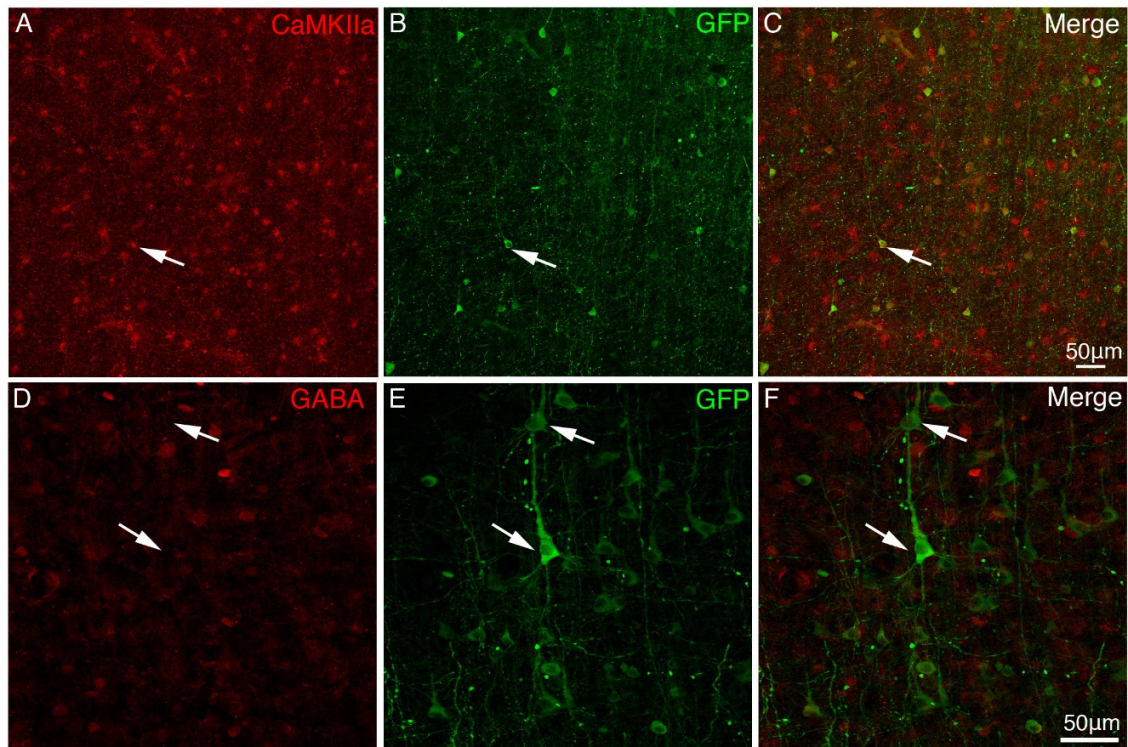

1  
2  
3  
4  
5  
6  
7  
8

**Fig. S4. Expression of Tau-GFP in excitatory neurons in macaque brain.** To identify neuronal transduction of AAV2/9 constructed with CaMKII $\alpha$  promoter, cortical sections of vLPFC were immunostained with anti-CaMKII $\alpha$  (A-C) and anti-GABA (D-F) antibodies. (A-C) Tau-GFP-expressing neurons around the injection site were identified CaMKII $\alpha$  positive. (D-F) Immunofluorescent staining with GABA antibody shows that the GFP-expressing neurons were negative with GABA. Arrowheads indicate Tau-GFP positive cell bodies.

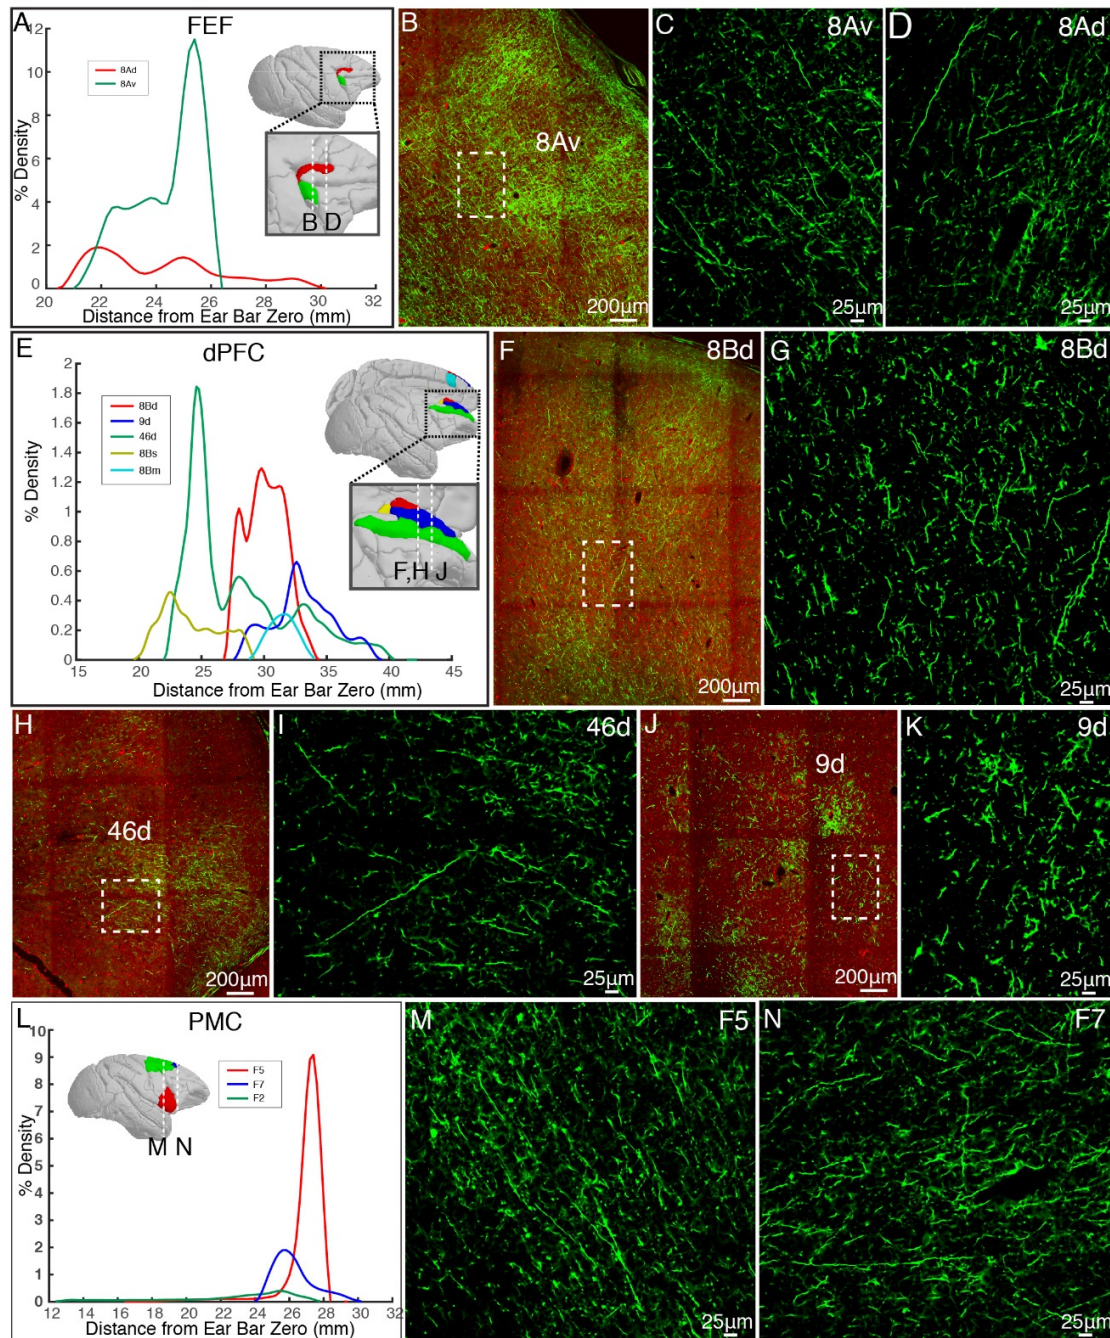

1  
 2 **Fig. S5. Representative cortical projections of vIPFC.** (A) Percentage of output density of vIPFC  
 3 projectome along the anterior-posterior axis of the FEF. (B-D) Representative two-photon images of  
 4 vIPFC axonal projections to FEF: 8Av and 8Ad. (E) Percentage of output density of vIPFC projectome  
 5 along the anterior-posterior axis of the dPFC. (F-J) Representative two-photon images of vIPFC axonal  
 6 projections to dPFC: 8Bd, 46d, and 9d. (L) Percentage of output density of vIPFC projectome along the  
 7 anterior-posterior axis of the PMC. (M, N) Representative images of vIPFC axonal projections to PMC:  
 8 F5 and F7.

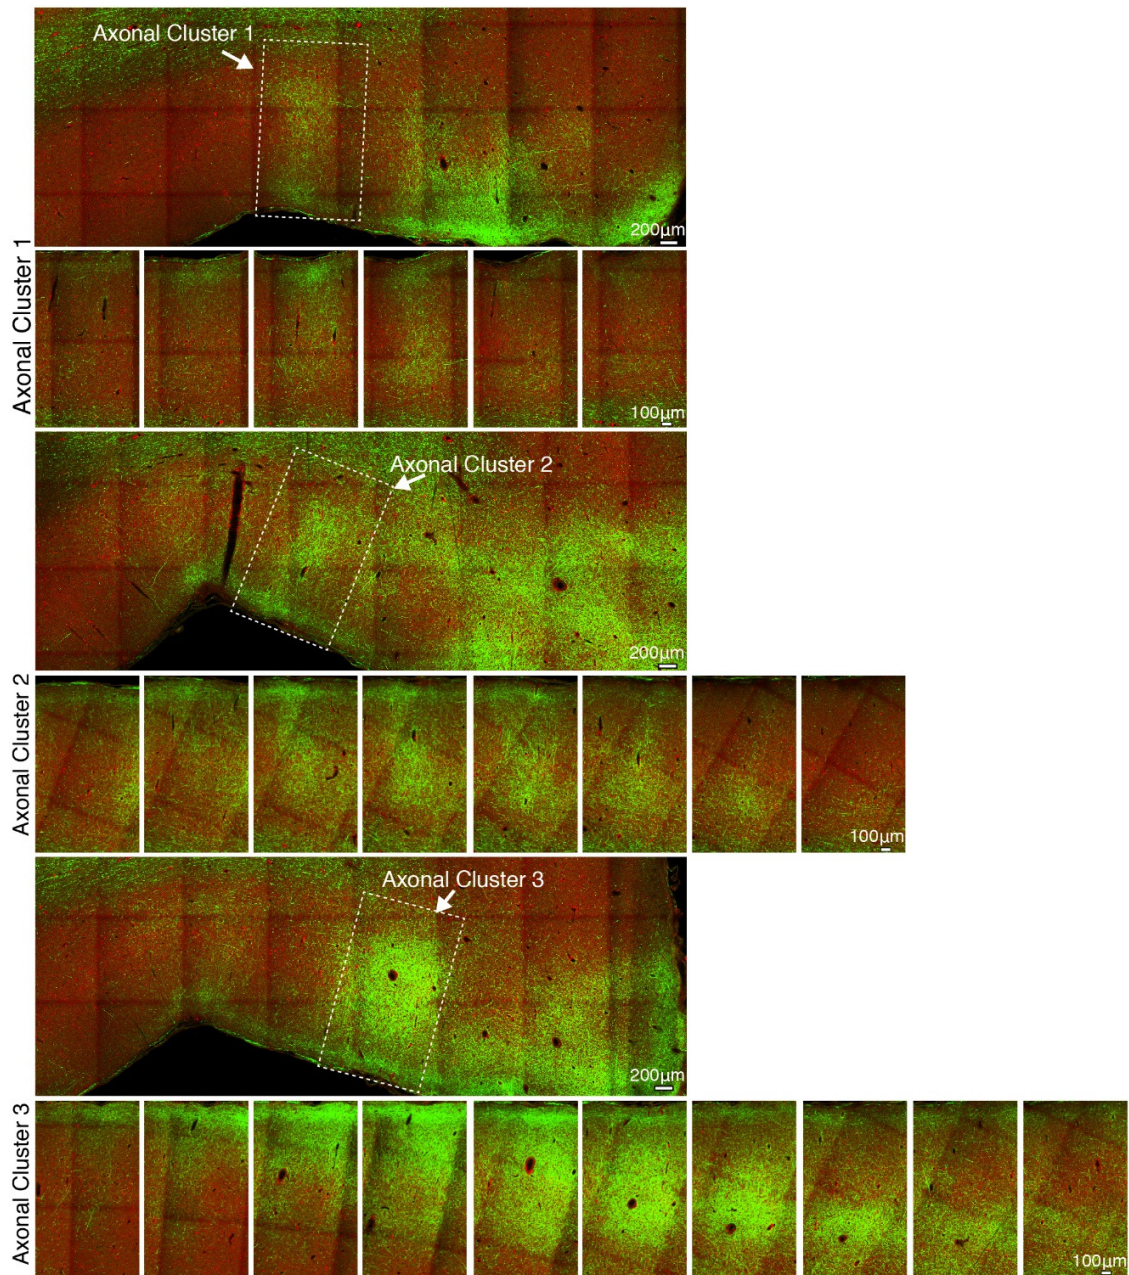

1  
2  
3  
4  
5  
6  
7

**Fig. S6. The spatial extent of axonal clusters in the frontal cortex.** GFP-labeled axonal fibers issued from vIPFC are overlaid with the autofluorescence image (acquired through the red channel) which provides anatomical landmarks of brain structures. Three representative axonal clusters are shown along the z-axis extent at 200  $\mu\text{m}$  interval between each slice.

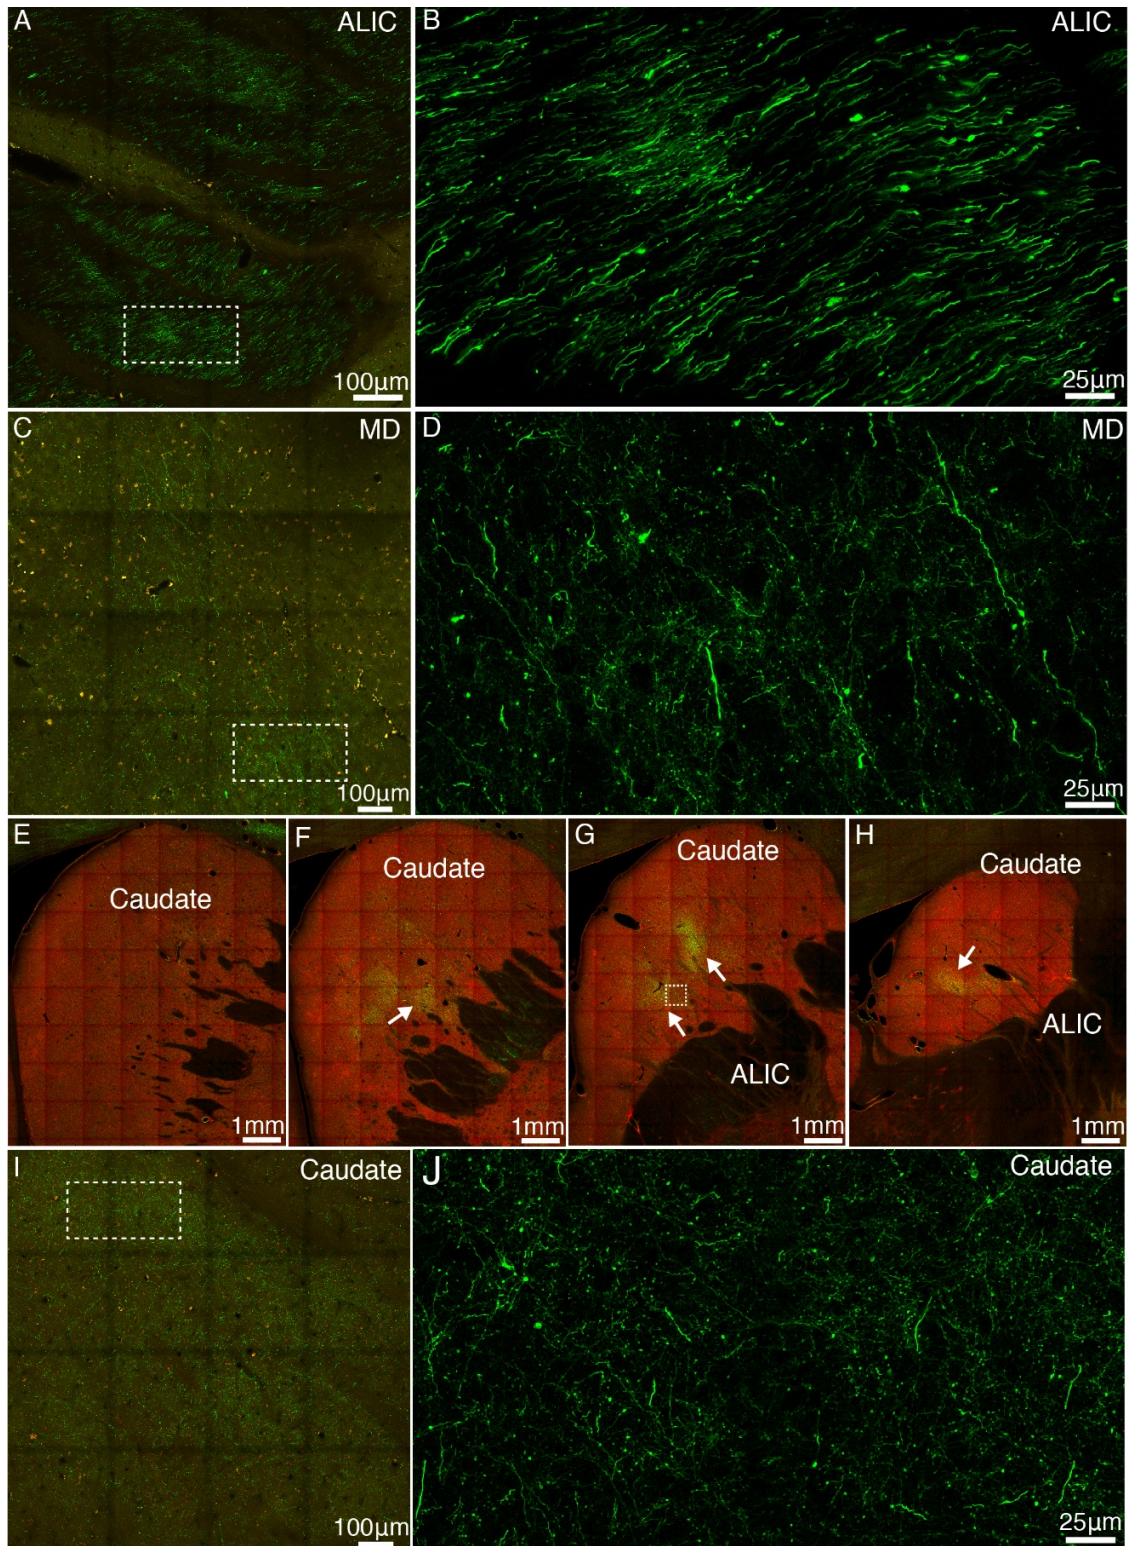

1  
2 **Fig. S7. Representative subcortical projections of vIPFC.** (A) GFP-labeled axonal bundles pass  
3 through the anterior limb of internal capsule (ALIC). The image of green channel was superimposed on  
4 to that of red channel for better visualization. (B) Close-up view of the boxed region in A. (C) GFP-

- 1 labeled axonal fibers in the mediodorsal (MD) thalamus. **(D)** Close-up view of the boxed region in C.
- 2 **(E-H)** GFP-labeled axon clusters (indicated by white arrows) were found in the medial and caudal parts
- 3 of caudate. **(I-J)** Close-up view of the dashed box in g with two levels of magnification.
- 4
- 5



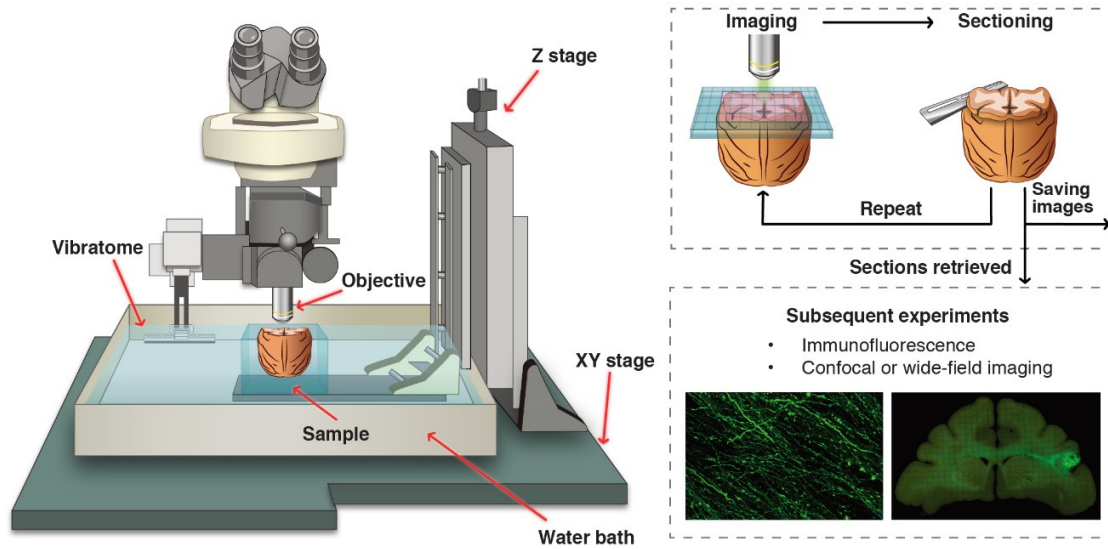

1  
2 **Fig. S8. A customized setup of serial two-photon tomography for macaque brain.** The STP  
3 tomography was integrated with a two-photon microscope and a vibratome, both of which were  
4 computer controlled and fully automated. The traveling range of XYZ stage was customized to 50 by  
5 60 by 70 mm to cover the entire macaque brain.  
6

1

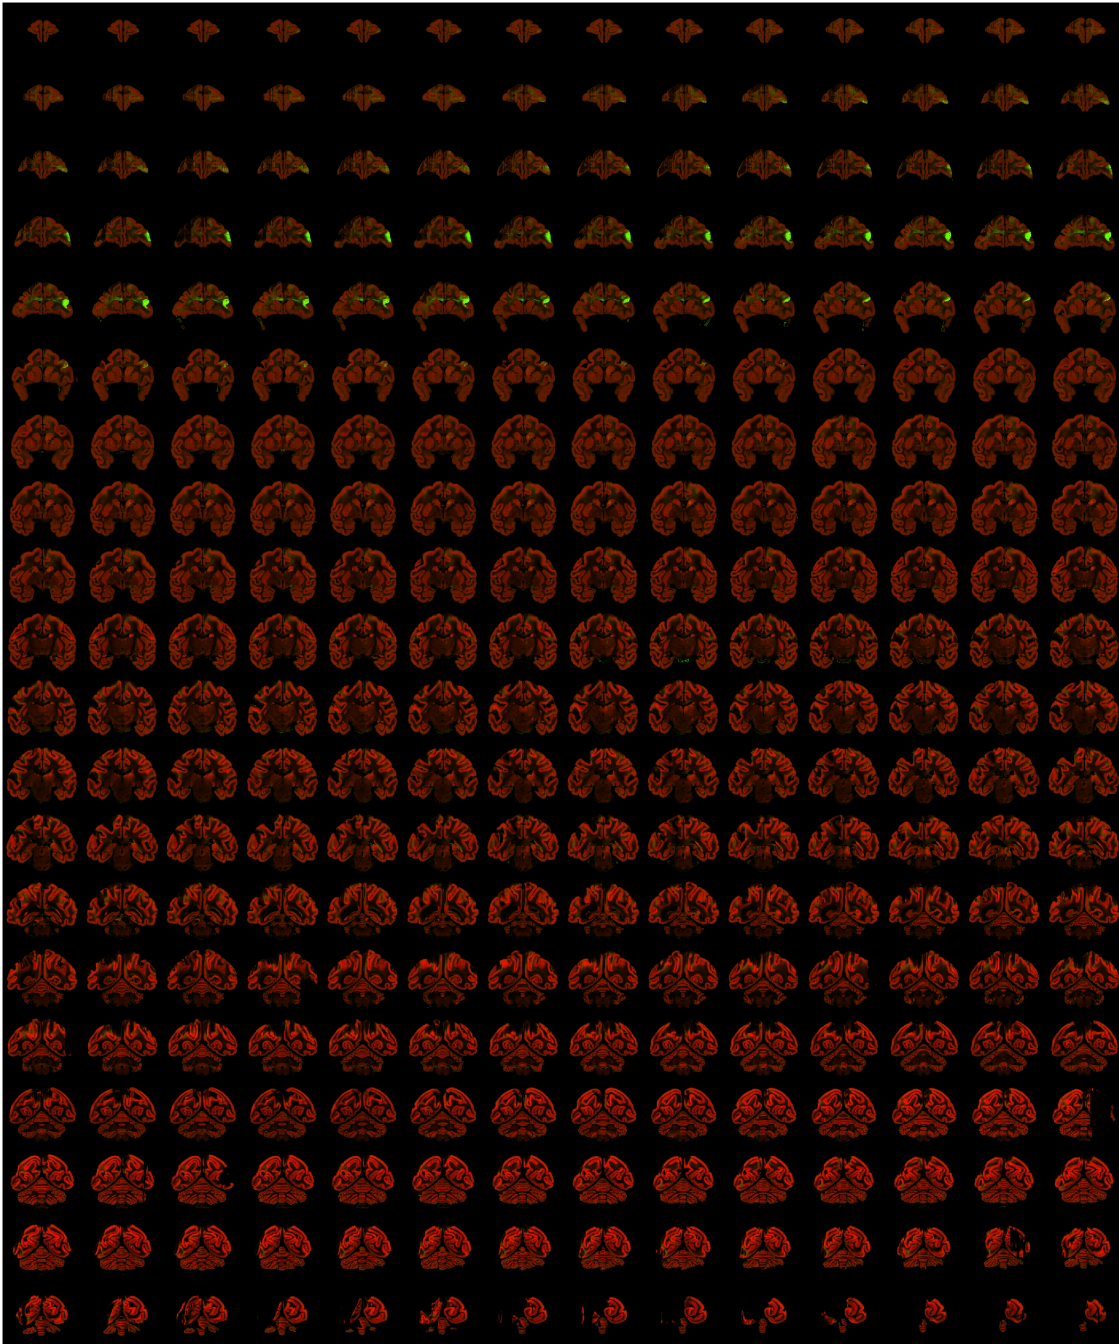

2

3

4

5

6

7

8

9

**Fig. S9. A typical STP tomography image set of a single macaque brain.** High-resolution (0.95  $\mu\text{m}/\text{pixel}$ ) images of serial sections of a single brain are shown as an example (injection into vIPFC). The stepping distance along z-axis is 200  $\mu\text{m}$ . The images acquired through the red channel are used as background. The injection site (vIPFC) and major projection targets can be readily observed in this 'montage' view.

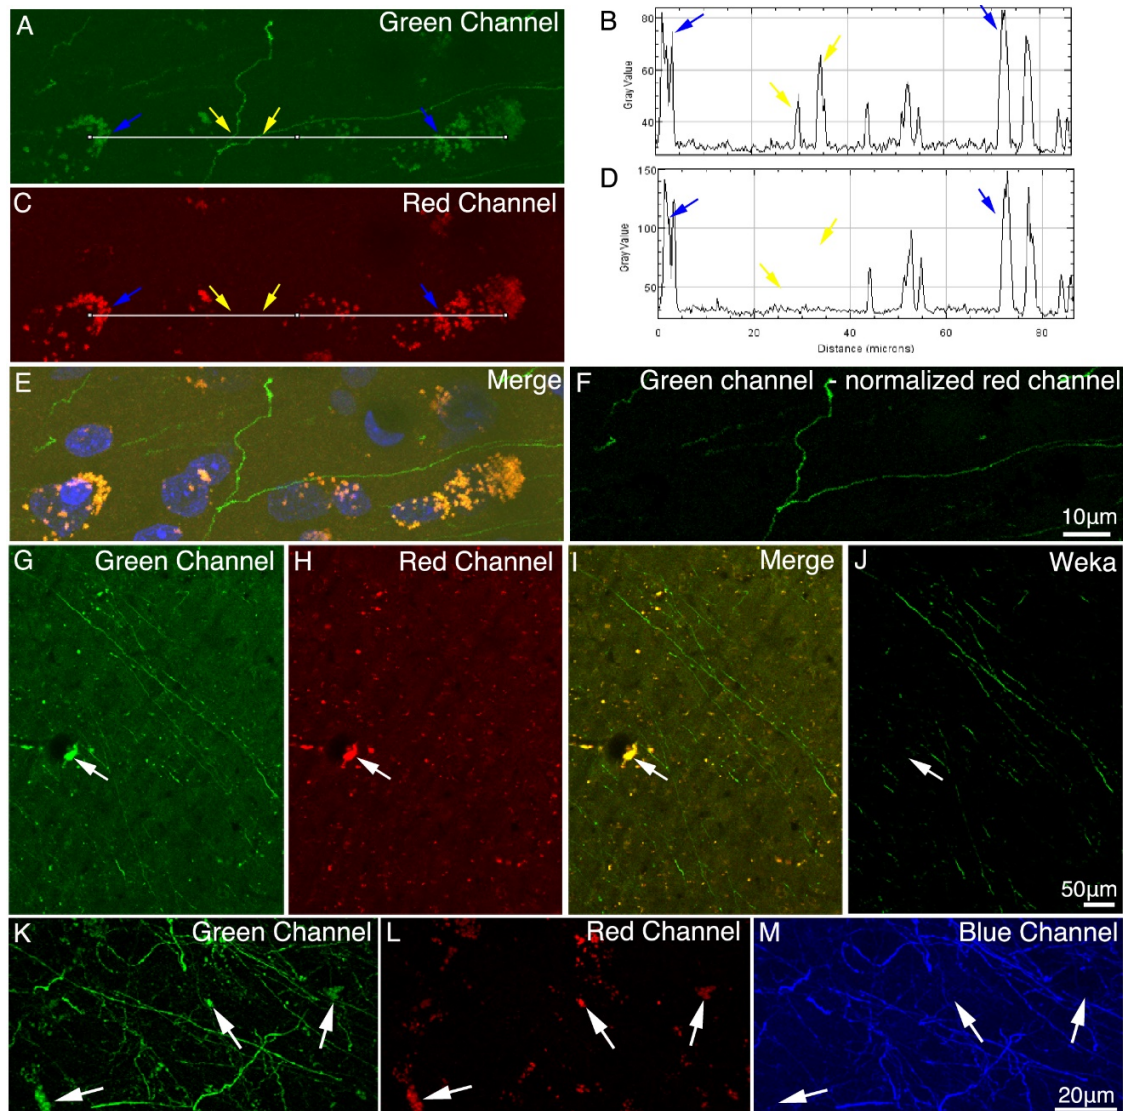

1  
2 **Fig. S10. Methods for background reduction.** (A-D) Properties of autofluorescence in macaque brain.  
3 Images in the right panel (B and D) show intensity profiles (measured using ImageJ on 8-bit TIF images)  
4 along the white line in the left panel (A and C). Yellow arrows indicate GFP signal, and blue arrows  
5 indicate background autofluorescence. Due to the broad emission spectrum of autofluorescence (E), the  
6 autofluorescence was reduced by subtracting the normalized autofluorescence signal in the red channel  
7 from the green channel (F). (G-J) A supervised machine learning approach was applied for removing  
8 autofluorescence. The classifier was trained to distinguish the GFP signal from background, and the  
9 segmented image (J) contained only GFP signal. White arrows indicate the autofluorescence puncta in  
10 image G-I. (K-M) The brain slice was stained with anti-GFP antibody and Alexa Fluor 405 conjugated  
11 secondary antibody to convert the GFP signal from green channel to blue channel. Unlike the green (K)  
12 and red (L) channels, the converted blue channel (M) did not contain high intensity autofluorescence  
13 puncta.

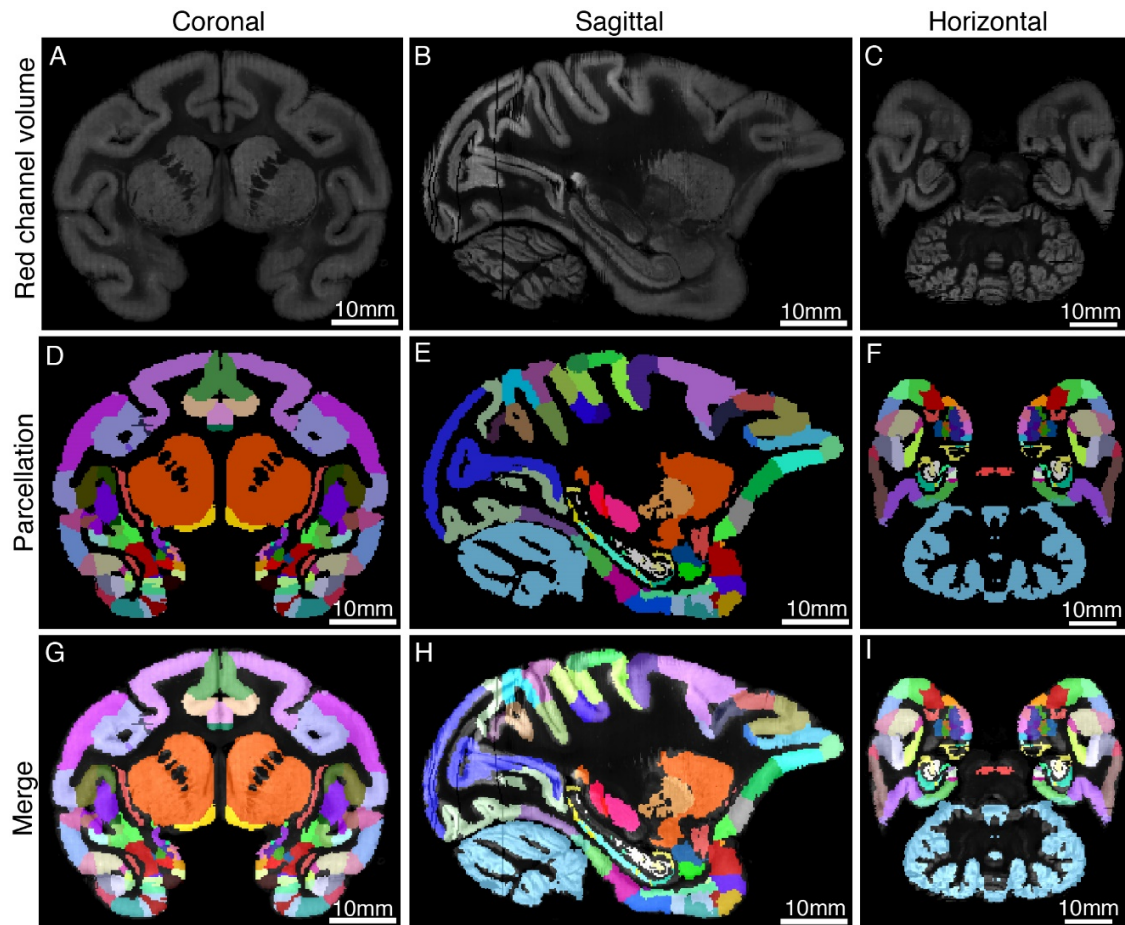

1  
2 **Fig. S11. Co-registration of STP images to the MRI-based template of macaque brain.** The STP  
3 tomography volume and the T1 volume of the monkey brain template were co-registered in a common  
4 3D space. The upper panel shows the coronal (A), sagittal (B), and horizontal (C) images of the warped  
5 red channel of STP tomography. (D-F) The parcellation of Saleem and Logothetis atlas was displayed  
6 on three planes. (G-I) The fluorescence images of STP data were merged with the MRI atlas of macaque  
7 brain.

8  
9

## 1   **References**

- 2   1.    Wang Z, *et al.* The relationship of anatomical and functional connectivity to resting-  
3   state connectivity in primate somatosensory cortex. *Neuron* **78**, 1116-1126 (2013).
- 4   2.    Lv Q, *et al.* Large-Scale Persistent Network Reconfiguration Induced by Ketamine  
5   in Anesthetized Monkeys: Relevance to Mood Disorders. *Biol Psychiatry* **79**, 765-  
6   775 (2016).
- 7   3.    Zhang Z, Cai DC, Wang Z, Zeljic K, Wang Z, Wang Y. Isoflurane-Induced Burst  
8   Suppression Increases Intrinsic Functional Connectivity of the Monkey Brain.  
9   *Front Neurosci* **13**, 296 (2019).
- 10  4.    Cai DC, *et al.* MECP2 Duplication Causes Aberrant GABA Pathways, Circuits and  
11  Behaviors in Transgenic Monkeys: Neural Mappings to Patients with Autism. *J*  
12  *Neurosci* **40**, 3799-3814 (2020).
- 13  5.    Zhan Y, *et al.* Diagnostic Classification for Human Autism and Obsessive-  
14  Compulsive Disorder Based on Machine Learning From a Primate Genetic Model.  
15  *Am. J. Psychiatry*, appiajp202019101091 (2020).
- 16  6.    Lv QM, *et al.* Normative analysis of individual brain differences based on a  
17  population MRI-based atlas of cynomolgus macaques. *Cereb Cortex*, (2020).
- 18  7.    Reveley C, *et al.* Three-Dimensional Digital Template Atlas of the Macaque Brain.  
19  *Cereb Cortex* **27**, 4463-4477 (2017).
- 20  8.    Dyrby TB, Baare WF, Alexander DC, Jelsing J, Garde E, Sogaard LV. An ex vivo  
21  imaging pipeline for producing high-quality and high-resolution diffusion-  
22  weighted imaging datasets. *Hum. Brain Mapp.* **32**, 544-563 (2011).
- 23  9.    D'Arceuil HE, Westmoreland S, de Crespigny AJ. An approach to high resolution  
24  diffusion tensor imaging in fixed primate brain. *Neuroimage* **35**, 553-565 (2007).
- 25  10.   Dietrich O, Raya JG, Reeder SB, Reiser MF, Schoenberg SO. Measurement of  
26  signal-to-noise ratios in MR images: influence of multichannel coils, parallel  
27  imaging, and reconstruction filters. *J. Magn. Reson. Imaging* **26**, 375-385 (2007).
- 28  11.   Kaufman L, Kramer DM, Crooks LE, Ortendahl DA. Measuring signal-to-noise  
29  ratios in MR imaging. *Radiology* **173**, 265-267 (1989).
- 30  12.   Sijbers J, den Dekker AJ, Van Audekerke J, Verhoye M, Van Dyck D. Estimation  
31  of the noise in magnitude MR images. *Magn. Reson. Imaging* **16**, 87-90 (1998).
- 32  13.   Mukherjee P, Chung SW, Berman JI, Hess CP, Henry RG. Diffusion tensor MR  
33  imaging and fiber tractography: technical considerations. *AJNR Am. J. Neuroradiol.*  
34  **29**, 843-852 (2008).
- 35  14.   Girard G, Whittingstall K, Deriche R, Descoteaux M. Towards quantitative  
36  connectivity analysis: reducing tractography biases. *NeuroImage* **98**, 266-278  
37  (2014).
- 38  15.   Tournier JD, Calamante F, Connelly A. MRtrix: Diffusion tractography in crossing  
39  fiber regions. *International Journal of Imaging Systems and Technology* **22**, 53-66  
40  (2012).
- 41  16.   Tournier JD, Calamante F, Connelly A. Determination of the appropriate b value  
42  and number of gradient directions for high-angular-resolution diffusion-weighted  
43  imaging. *NMR Biomed.* **26**, 1775-1786 (2013).
- 44  17.   Jones DK. Tractography gone wild: probabilistic fibre tracking using the wild  
45  bootstrap with diffusion tensor MRI. *IEEE Trans. Med. Imaging* **27**, 1268-1274  
46  (2008).
- 47
